1 **Comparative genomic analyses and a novel linkage map for cisco (*Coregonus artedi*)**  
2 **provides insight into chromosomal evolution and rediploidization across salmonids**

3  
4 Danielle M. Blumstein<sup>1</sup>, Matthew A. Campbell<sup>2</sup>, Matthew C. Hale<sup>3</sup>, Ben J. G. Sutherland<sup>4</sup>,  
5 Garrett J. McKinney<sup>5</sup>, Wendylee Stott<sup>6</sup>, Wesley A. Larson<sup>7, 1</sup>

6  
7 <sup>1</sup> College of Natural Resources, University of Wisconsin-Stevens Point

8 <sup>2</sup> University of Alaska Museum of the North, University of Alaska Fairbanks, Fairbanks, AK,  
9 99775, USA

10 <sup>3</sup> Department of Biology, Texas Christian University, Fort Worth, TX, 76122

11 <sup>4</sup> Pacific Biological Station, Fisheries and Oceans Canada, Nanaimo, V9T 6N7, British  
12 Columbia, Canada

13 <sup>5</sup> National Marine Fisheries Service, Northwest Fisheries Science Center

14 <sup>6</sup> U.S. Geological Survey, Great Lakes Science Center, Ann Arbor, MI

15 <sup>7</sup> U.S. Geological Survey, Wisconsin Cooperative Fishery Research Unit, College of Natural  
16 Resources, University of Wisconsin-Stevens Point

17

18

19 **Data deposition:** Raw sequence data has been uploaded to SRA under BioProject  
20 PRJNA555579

21

22 **Corresponding author:** Wesley Larson (e-mail: [wlarson@uwsp.edu](mailto:wlarson@uwsp.edu), phone: 715-346-3150,  
23 office mailing address: U.S. Geological Survey, Wisconsin Cooperative Fishery Research Unit,  
24 College of Natural Resources, University of Wisconsin)

25

26 **Abstract**

27 Whole-genome duplication (WGD) is hypothesized to be an important evolutionary  
28 mechanism that can facilitate adaptation and speciation. Genomes that exist in states of both  
29 diploidy and residual tetraploidy simultaneously are of particular interest, as understanding the  
30 mechanisms that maintain this mosaic of ploidy after WGDs may provide important insights into  
31 evolutionary processes. Salmonids are a useful model to study the effect of WGDs due to the  
32 extensive diversity that has evolved following an ancestral autotetraploidization event. Although  
33 most of the salmonid genome has reverted to diploidy following WGD, approximately 25% of  
34 the chromosomes continue to exist in a state of residual tetrasomy. In this study, we generate a  
35 novel linkage map for cisco (*Coregonus artedii*) and conduct comparative genomic analyses to  
36 refine our understanding of chromosomal fusion/fission history across salmonids. Additionally,  
37 we propose a new naming strategy, protokaryotypes, that facilitates comparisons across  
38 Salmonids by standardizing naming to ancestral chromosomes from northern pike (*Esox lucius*).  
39 The female linkage map for cisco contains 20,450 loci, 3,383 of which are likely contained  
40 within residually tetraploid regions of the genome. Comparative genomic analysis revealed that  
41 patterns of residual tetrasomy are generally conserved across species, but there is interspecific  
42 variation in the relative extent of the residual tetrasomy. Additionally, with the current reference  
43 genomes available, we only find evidence of residual tetrasomy in seven of the eight  
44 chromosomes that have been previously hypothesized to show this pattern. This interspecific  
45 variation may have important implications for understanding salmonid evolutionary histories and  
46 informing future conservation efforts.

47

48 **Keywords:** coregonines; comparative genomics; linkage mapping; residual tetrasomy;  
49 Salmonidae; whole genome duplication

## 50 **Introduction**

51 The evolutionary significance of whole-genome duplications (WGDs) has been  
52 intensively debated for decades (e.g; Ohno 1970; Santini et al. 2009; Wood et al. 2009; Zhan et  
53 al. 2014; Mayrose et al. 2015; Van de Peer et al. 2017). Multiple studies have hypothesized that  
54 WGD is an important evolutionary mechanism that can facilitate adaptation on short- and long-  
55 term evolutionary timescales (Ohta 1989, Selmecki et al. 2015; Van de Peer et al. 2017). For  
56 example, genes found in polyploid regions are able to gain new function (i.e.,  
57 neofunctionalization) without the consequences of deleterious mutations affecting the main  
58 function of the second gene copy. This may facilitate adaptive molecular divergence and the  
59 evolution of new phenotypes (Wittbrodt et al 1998; Wendel 2000; Rastogi and Liberles 2005).  
60 However, other studies have hypothesized that WGD presents significant challenges for meiosis  
61 and mitosis (Hollister 2015) and may not have as much of an effect on evolution as originally  
62 thought (Mayrose et al. 2011; Arrigo and Barker 2012; Vanneste et al. 2014; Clarke et al. 2016).  
63 A consensus is therefore yet to be reached on the evolutionary impact of WGD relative to other  
64 evolutionary forces.

65 Conducting genetic studies on organisms having undergone relatively recent WGD has  
66 been challenging due to the inability to differentiate alleles and sequences from the same  
67 chromosome (homologs) from those on the duplicated chromosome (homeologs) (Limborg et al.  
68 2016b). Fortunately, approaches leveraging gamete manipulation, high sequencing coverage, and  
69 long read sequencing have improved our ability to characterize duplicated regions. For example,  
70 linkage mapping with haploids and doubled haploids has facilitated analysis of duplicated  
71 regions in salmonids (Brieuc et al. 2014; Kodama et al. 2014; Lien et al. 2016; Waples et al.  
72 2016). Further, long-read sequencing technologies, such as PacBio and Oxford Nanopore, have  
73 made it possible to assemble complex genomes with convoluted duplication histories  
74 (Kyriakidou et al. 2018). These technological advances have revolutionized our ability to  
75 understand genomic architecture in that have adaptively radiated to form dozens of species  
76 following an ancestral WGD in lineages such as salmonids (Lien et al. 2016; Robertson et al.  
77 2017; Campbell et al. 2019) and many plant species (Alix et al. 2017).

78 Salmonids are derived from an ancestral species that underwent a WGD ~100 million  
79 years ago (Ss4R, Allendorf and Thorgaard 1984; Berthelot et al. 2014; Macqueen and Johnston  
80 2014; Lien et al. 2016) and have since diversified into a broad array of both ecologically and  
81 genetically distinct taxa. The Salmonidae family is comprised of three subfamilies: Salmoninae  
82 (salmon, trout, and char), Thymallinae (graylings), and Coregoninae (whitefish and ciscoes)  
83 (Norden 1961), and diversification of these subfamilies post-dates the Ss4R, occurring 40-50  
84 million years ago (Campbell et al. 2013; Macqueen and Johnston 2014). Phylogenetic analysis  
85 has thus far revealed that the majority of the salmonid genome returned to a diploid inheritance  
86 state prior to the basal split of each of the three subfamilies (Robertson et al. 2017). The  
87 rediploidization process is still incomplete and approximately 20-25% of each salmonid genome  
88 still shows signals of tetrasomic inheritance (i.e., residual tetrasomy, or the recombination

89 between homeologs that results in the exchange of alleles between homeologous chromosomes  
90 (Allendorf et al. 2015; Lien et al. 2016; Robertson et al. 2017)).

91 Evidence for residual tetrasomy in the salmonids was found using allozyme studies in  
92 experimental crosses (Allendorf and Danzmann 1997) and, more recently, by linkage maps,  
93 sequenced genomes, and sequence capture (Kodama et al. 2014; McKinney et al. 2017;  
94 Robertson et al. 2017; Christensen et al. 2018b; Pearse et al. 2018). High-density linkage maps  
95 that include both duplicated and non-duplicated markers have revealed that eight pairs of  
96 homeologous chromosomes display evidence of conserved residual tetraploidy despite  
97 independent fusion and fission events, as well as general evolutionary history across species  
98 (Brieuc et al. 2014; Kodama et al. 2014; Sutherland et al. 2016). These chromosomes, referred to  
99 as the “magic eight,” have been found in linkage mapping studies of coho salmon *Oncorhynchus*  
100 *kisutch* (Kodama et al. 2014), Chinook salmon *O. tshawytscha* (Brieuc et al. 2014; McKinney et  
101 al. 2016; McKinney et al. 2019), pink salmon *O. gorbuscha* (Tarpey et al. 2017), chum salmon  
102 *O. keta* (Waples et al. 2016), and sockeye salmon *O. nerka* (Larson et al. 2015). Additionally,  
103 previous mapping studies have revealed that at least one of the two homeologs exhibiting  
104 residual tetraploidy in these pairs is within a fusion, suggesting that chromosomal structure may  
105 play a role in maintenance of residual tetraploidy (Brieuc et al. 2014; Kodama et al. 2014;  
106 Sutherland et al. 2016). Analysis of sequenced genomes for Atlantic salmon (*Salmo salar*) and  
107 rainbow trout (*O. mykiss*) has revealed similar patterns, although in these studies only seven of  
108 these pairs were identified as displaying clear signals of conserved residual tetraploidy (Lien et  
109 al. 2016; Campbell et al. 2019). Sequence capture analysis also suggests that seven of the pairs  
110 display conserved signals of residual tetrasomy across species (Robertson et al. 2017). This led  
111 to the definition of two types of homeologous regions: 1) ancestral ohnologue resolution (AORe)  
112 regions with relatively low sequence similarity with ancestral homeologs that likely  
113 rediploidized prior to species diversification; and 2) lineage ohnologue resolution (LORe)  
114 regions with high sequence similarity among homeologs, likely maintained by residual  
115 tetraploidy (Robertson et al. 2017). Collectively, these studies have provided important insights  
116 into the salmonid WGD, but many unresolved questions related to the rediploidization process  
117 and maintenance of residual tetrasomy still exist.

118 Over the past decade, a proliferation of genomic resources has occurred within  
119 salmonids. Currently, linkage maps that include duplicated regions are available for five  
120 *Oncorhynchus* species, and genome assemblies are available for grayling *Thymallus thymallus*  
121 (Savilammi et al. 2019), Atlantic salmon (Lien et al. 2016), Arctic char *Salvelinus alpinus*  
122 (Christensen et al. 2018b), rainbow trout (Pearse et al. 2018), and Chinook salmon (Christensen  
123 et al. 2018a). These resources permit investigation into the processes of rediploidization and  
124 residual tetrasomy across the salmonid family. However, the genome resources for some of the  
125 lineages, such as the Coregoninae subfamily, remain undercharacterized. In the current study,  
126 we develop a high-density linkage map for North American cisco (*Coregonus artedii*), the first  
127 haploid linkage map for the Coregoninae subfamily, and analyze existing genomic resources for  
128 other salmonids with the goal of investigating patterns of residual tetrasomy and chromosomal

129 fusion and fission history across the salmonid family, with particular focus on the coregonines.  
130 Our results suggest that (1) interspecific patterns of residual tetrasomy differ more than  
131 previously observed; (2) binary definitions of chromosome ploidy status may not adequately  
132 capture variation within and among species; (3) linkage maps and sequenced genomes identify  
133 slightly different patterns regarding residual tetrasomy; and (4) a large number of fissions and  
134 fusions are specific to the base of the Coregoninae subfamily, and species-specific fusions of this  
135 lineage are rare. This study uses new and existing resources to conduct the most comprehensive  
136 analysis of residual tetrasomy across the salmonid phylogeny to date, revealing important  
137 patterns that likely impacted the evolutionary history of this diverse and important taxonomic  
138 group.

139

## 140 **Methods**

### 141 *Experimental crosses for linkage mapping*

142 Genotypes from diploid and haploid families were used to build sex-specific linkage  
143 maps. Diploid crosses were constructed from cisco collected in northern Lake Huron (45°  
144 58'51.6" N -84°19'40.8" W, USA) during spawning season (November 2015) by U. S. Fish and  
145 Wildlife Service crews using standardized gill net assessment methods. Gametes for haploid  
146 crosses were collected following the same methods, from the same location and month but in  
147 2017. Gametes were extracted from mature fish and eggs were combined directly with sperm to  
148 produce diploid crosses or with sperm that had been irradiated with 300,000  $\mu\text{J}/\text{cm}^2$  UV light for  
149 two minutes to break down the DNA to produce haploid crosses. UV irradiation leaves the sperm  
150 intact so that the egg can be activated but no paternal genetic material is contributed (i.e.,  
151 gynogenesis, Chourrout 1982), resulting in haploid embryos developing with maternal genetic  
152 material only. Crosses were made in the field and transported to the U. S. Geological Survey-  
153 Great Lakes Science Center, Ann Arbor, Michigan (USA) for rearing. Tissue samples (fin clips)  
154 were taken from adult parents, from offspring of the diploid crosses at age two, and from  
155 haploids approximately 50 days post fertilization. All samples were preserved in a combination  
156 of 95% ethanol and 5% EDTA and sent to the University of Wisconsin, Stevens Point Molecular  
157 Conservation Genetics Lab for processing. Laboratory and field collections were conducted  
158 under the auspices of the U.S. Fish and Wildlife Service and U.S. Geological Survey-Great  
159 Lakes Science Center and all necessary animal care and use protocols were filed by these  
160 agencies.

161

### 162 *DNA extraction and RAD-sequencing library preparation*

163 DNA was extracted using DNeasy 96 Blood and Tissue Kits (Qiagen, Valencia,  
164 California) per the manufacturer's instructions. Quality and quantity of the extracted genomic  
165 DNA was measured using the Quant-iT PicoGreen double-stranded DNA Assay (Life  
166 Technologies) with a plate reader (BioTek). To confirm ploidy of haploid samples, parents and  
167 offspring were genotyped using six polymorphic microsatellite loci known to occur at diploid  
168 sites developed by Angers et al. (1995), Patton et al. (1997), and Rogers et al. (2004), and

169 individuals were classified as haploids if only a single allele was present at all loci. The  
170 probability of not detecting a diploid if a diploid was present is ~1.09% based on microsatellite  
171 heterozygosity in the parental population (unpublished data, Wendylee Stott).

172 Genomic DNA from diploids and confirmed haploids was prepared for RAD sequencing  
173 using the SbfI restriction enzyme following the methods outlined in Ali et al. (2016) except  
174 shearing restriction digested DNA was done with NEBNext® dsDNA Fragmentase® (New  
175 England Biolabs, Inc) instead of sonication. DNA was then purified and indexed using  
176 NEBNext® Ultra™ DNA Library Prep Kit for Illumina® per the manufacturer's instructions  
177 (New England Biolabs, Inc). Libraries were sequenced on a HiSeq4000 with paired end 150bp  
178 chemistry at the Michigan State Genomics Core Facility (East Lansing, MI).

179  
180 *SNP discovery and genotyping*

181 Quality filtering, SNP identification, and genotyping was conducted using *STACKS* v.2.2  
182 (Rochette and Catchen 2017). First, samples were demultiplexed with *process\_radtags* with  
183 flags -c, -q, -r, -t 140, --bestrad. Markers were discovered *de novo* and genotyped within  
184 individuals with *ustacks* (flags = -m 3, -M 5, -H --max\_locus\_stacks 4, --model\_type bounded, --  
185 bound\_high 0.05, --disable-gapped). A catalog of loci was created using a subset of the  
186 individuals (diploid parents = 8, haploid parents = 5, wild fish = 38, total cisco = 51) with *cstacks*  
187 (-n of 3, --disable-gapped). The 38 wild fish used in the catalog were collected from the same  
188 geographic area using the same collection methods as listed above and were included to search  
189 for a sex identification marker, which was unsuccessful (*data not shown*).

190 Putative loci within each individual fish were matched against the catalog with *sstacks*  
191 (flag = --disable-gapped), *tsv2bam* was used with only the forward reads to orient the data by  
192 SNP, and *gstacks* was used to combine genotypes across individuals. Only the forward reads  
193 from the paired-end data were used in *gstacks* due to variable read depth in reverse reads and  
194 thus less reliable genotyping. *gstacks* was also run separately with the forward and reverse reads  
195 using *tsv2bam* to assemble longer contigs for sequence alignment and annotation. Final genotype  
196 calls were output as VCF files with *populations* (flags = -r 0.75), with each family grouped as a  
197 separate population in the *popmap* sample interpretation file. VCFtools (Danecek et al. 2011)  
198 was used to identify and remove individuals from the study that were missing more than 30% of  
199 data.

200 Maximum likelihood-based methods developed by Waples et al. (2016) were used to  
201 identify loci that could be mapped in haploid crosses and to identify potentially duplicated loci.  
202 Custom Python scripts available on GitHub (Python Software Foundation version 2.7) (see *Code*  
203 *Availability*), were used to filter the haplotype VCF file output from the *populations* module to  
204 identify loci that could be mapped in the diploid families. Loci missing more than 25% of data  
205 and loci that were genotyped as heterozygous in both parents of diploid families (and therefore  
206 could not be reliably mapped) were removed (as in Larson et al. 2015). Individual genotypes  
207 were exported with the custom Python scripts as *LepMap3* input files. As a final step before  
208 linkage mapping, genotypes from all seven families (haploid and diploid) were combined into a

209 single dataset to form the final female *LepMap3* input file and the four diploid families were  
210 combined into a single dataset to form the final male *LepMap3* input file.

211

### 212 *Linkage mapping*

213 The program *LepMap3* (Rastas 2017) was used to construct linkage maps following the  
214 methods of McKinney et al. (2016). Due to heterochiasmy (i.e., recombination rate differences  
215 between males and females) that occurs in the Salmonidae family (Sakamoto et al. 2000), a  
216 separate map was constructed for each sex. Loci were filtered and clustered into linkage groups  
217 (LGs) based on recombination rates by calculating logarithm of the odds (LOD) scores between  
218 all pairs of loci with the *SeparateChromosomes2* module. The LOD scores were chosen by  
219 increasing the LOD value by one until the number of LGs stabilized and was similar to that  
220 expected based on the haploid karyotype of cisco (N=40, Phillips et al. 1996). The final LOD  
221 scores used to generate the map were LOD = 15 and 5 for the female and the male maps,  
222 respectively. Loci were then ordered within LGs by utilizing paternal and maternal haplotypes as  
223 inheritance vectors with the *OrderMarkers2* module. We used a minimum marker number per  
224 LG of 100 for the female map and 40 for the male map. LGs were reordered and markers  
225 removed until no large gaps remained (Rastas 2017).

226

### 227 *Comparative analysis of syntenic regions of linkage maps via MAPCOMP*

228 MAPCOMP can be used to compare syntenic relationships among markers between  
229 linkage maps of any related species using a genome intermediate from another related species  
230 (Sutherland et al. 2016). Here, MAPCOMP was used to compare the cisco map with other  
231 *Coregonus* spp.; lake whitefish *C. chupeaformis* (Gagnaire et al. 2013), European whitefish *C.*  
232 *lavaretus* “Albock” (De-Kayne and Feulner 2018), as well as other representative species from  
233 other salmonid genera (i.e., Atlantic salmon (Lien et al. 2016), brook trout *S. fontinalis*  
234 (Sutherland et al. 2016), and Chinook salmon (Brieuc et al. 2014) and a representative of the  
235 outgroup to the salmonid WGD, northern pike *Esox lucius* (Rondeau et al. 2014). All code to  
236 collect and prepare maps, and run the analysis are available on GitHub (see *Code Availability*).

237 MAPCOMP pairs loci between the two compared linkage maps if they align at the same  
238 locus or close to each other on the same contig or scaffold (Sutherland et al. 2016). Due to the  
239 large phylogenetic distance covered in this analysis, two reference genomes; grayling  
240 (Savilammi et al. 2019) and Atlantic salmon (Lien et al. 2016) were used for comparisons. As  
241 salmonid chromosomal evolution is typified by Robertsonian fusions (Phillips and Rab 2001),  
242 fused chromosome arms in cisco, lake whitefish, and European whitefish were identified by  
243 aligning cisco markers to multiple salmonid resources to identify cases where one cisco LG  
244 corresponded with at least two chromosome arms in another species. The fusion and fission  
245 phylogenetic history was plotted based on the most parsimonious explanation of common fusions  
246 among *Coregonus* spp. basing the approximate timings of fusions on shared fusions among  
247 species. Fusion history shared at the base of the Salmoninae lineage was taken from earlier work  
248 (Sutherland et al. 2016).

249  
250  
251  
252  
253  
254  
255  
256  
257  
258  
259  
260  
261  
262  
263  
264  
265  
266  
267  
268  
269  
270  
271  
272  
273  
274  
275  
276  
277  
278  
279  
280  
281  
282  
283  
284  
285  
286  
287  
288

*Homeolog identification, similarity and inheritance mode*

Homeologous chromosome arms can be identified in haploid crosses by mapping multiple alleles of duplicated markers as described in Briec et al. (2014). Duplicated markers in cisco were mapped using this method, and data obtained on duplicated markers from previously constructed linkage maps for coho salmon (Kodama et al. 2014), Chinook salmon (McKinney et al. 2019), pink salmon (Tarpey et al. 2017), chum salmon (Waples et al. 2016), and sockeye salmon (Larson et al. 2015). Homeologs were then ranked based on the number of markers supporting each known homeologous relationship.

Homeology was assessed by comparing DNA sequence similarity between homeologous arms from chromosome-level genome assemblies. Genomes included in this analysis were grayling (GCA\_004348285.1, Savilammi et al. 2019) Atlantic salmon (GCF\_000233375.1, Lien et al. 2016), Arctic char (GCF\_002910315.2, Christensen et al. 2018b), rainbow trout (GCA\_002163495.1, Pearse et al. 2018), and Chinook salmon (GCF\_002872995.1, Christensen et al. 2018a). Homeologous pairs of chromosomes originating from the Ss4R duplication were known from original studies or through MAPCOMP comparisons and whole chromosomes containing the target chromosome pairs to be compared in each contrast were aligned to each other with LASTZ v1.02 (Harris 2007) following methods outlined in Lien et al. (2016). Options specified with LASTZ included --chain --gapped --gfextend --identity=75.0..100. --ambiguous=iupac --exact=20. The analysis was restricted to alignments with minimum percent match values of 75%, and a minimum length of 1,000 base pairs to minimize the likelihood of spurious alignments. Overall similarity of a homeologous pair was represented by the median percent similarity of all alignments, weighted by alignment length, and summarized with boxplots for each homeologous pair in each species ordered based on descending median percentage sequence similarity.

Each homeologous pair was classified into one of two categories, tetrasomic or disomic, using a machine learning approach. From the 25 homeologous pairs originating at the Ss4R for each species, a training set was constructed containing the four highest and lowest sequence similarity homeolog pairs. A  $k$  – nearest neighbor classification (knn) approach was then applied to the dataset using this training set. The  $k$  nearest-neighbors was determined by using a repeated 10-fold cross validation of 100 iterations with the trainControl function in the R package caret (v6.0-84, Kuhn 2019). The  $k$  for each species with the largest number of neighbors exhibiting the highest accuracy with the training set was selected. This  $k$  was then used to classify homeologous pairs as disomic or tetrasomic, along with the predefined training set (knn function, Ripley and Venables 2019). Overall, similarity between the two predicted categories from the  $knn$  classification was tested with a Wilcoxon test (R Core Team 2018) incorporating percent similarity from all alignments to determine whether the categories displayed significantly different sequence similarity between homeologs ( $\alpha = 0.01$ ). All scripts used in this analysis are available on GitHub (see *Code Availability*).



## 289 **Results**

### 290 *RADseq, SNP discovery, and data filtering*

291 RADseq data were obtained from 746 cisco across seven families, with an average of 4.1  
292 M reads per individual (range: 1.1 – 30.8 M reads per individual). Individuals that were  
293 genotyped at more than 30% of loci and loci that were genotyped in more than 75% of the total  
294 individuals were retained, resulting in a dataset of 676 individuals (n = 333 diploid offspring;  
295 330 haploid offspring; and 13 parents) and 49,998 unique loci (Supplementary file S1).

296

### 297 *Linkage Mapping*

298 A total of 22,459 unique loci were identified in the female (Figure 1) and male linkage  
299 maps (Supplementary file S2). The female map included 20,450 loci distributed across 38 LGs  
300 (Table 1), the male map included 6,340 loci distributed across 40 LGs, and 4,012 loci were  
301 present on both maps (Supplementary file S3). A total of 40 chromosomes was expected from  
302 karyotyping of coregonine fishes from the Great Lakes (Phillips et al. 1996), which matches the  
303 number of LGs mapped in males. However, male LGs 39 and 40 in males contained relatively  
304 few markers and may be fragments of other linkage groups rather than the two linkage groups  
305 that were not mapped in females. Eight LGs (i.e., Cart01 – Cart08) were identified as  
306 metacentric based on homology to two chromosome arms in other salmonids using MAPCOMP  
307 (*see below*). In the female map, metacentric LGs were on average 85.44 cM (57.72 – 101.35 cM)  
308 and contained 739 loci (range: 685 - 867). Putative acrocentric LGs in the female map were on  
309 average 59.12 cM (50.97 - 64.53 cM) and contained 484 loci (range: 296 - 585). The total length  
310 of the female map was 2,456.98 cM. The average lengths of metacentric LGs on the male map  
311 were 66.76 cM (51.62 – 87.14 cM) and they contained 212 loci on average (range: 159 – 278).  
312 Putative acrocentric LGs in the male map were on average 57.00 cM (40.54 – 83.66 cM) and  
313 contained 145 loci (range: 41 – 224). The total length of the male map was 2,357.97 cM. We  
314 identified 3,383 putatively duplicated loci on the female linkage map, and of these, 2,671 loci  
315 mapped to one paralog and 709 loci mapped to both paralogs.

316

### 317 *Comparative analysis of syntenic regions of linkage maps via MAPCOMP*

318 The main focus of our comparative analysis was to define the homologous and  
319 homeologous relationships among the linkage maps available for the coregonines, specifically in  
320 cisco (current study), lake whitefish (Gagnaire et al. 2013), and European whitefish (De-Kayne  
321 and Feulner 2018), and bring these species into the context of the broader chromosomal  
322 correspondence by identifying the homologous chromosome arms in brook trout, Atlantic  
323 salmon, and Chinook salmon, as well as the non-duplicated northern pike (Table 2,  
324 Supplementary file S4). To facilitate these comparisons, we have defined the term  
325 protokaryotype (PK). PKs correspond to hypothetical ancestral salmonid chromosomes pre-  
326 duplication inferred from observing a representative genome of the non-duplicated sister lineage  
327 of salmonids from the Esociformes and are ordered 01-25. Protokaryotypes correspond 1:1 with  
328 the northern pike genome but have two descendant homeologous regions within salmonid

329 genomes. For example, PK 01 corresponds to northern pike chromosome 01 and was an ancestral  
330 pre-duplication salmonid chromosome which gave rise to homeologous Atlantic salmon  
331 chromosomes Ssa09c (PK 01.2) and Ssa20b (PK 01.1) and to homeologous rainbow trout  
332 Omy27 (PK 01.1) and Omy24 (PK 01.2) (Supplemental file S7). PKs in the previously  
333 hypothesized “magic eight” from linkage mapping studies are PKs 02, 06, 09, 11, 20, 22, 23, 25.  
334 PKs defined as LORes by Robertson et al. (2017) and those that displayed residual tetraploidy in  
335 previous genome-based studies (Lien et al. 2016; Campbell et al. 2019) are the same as these  
336 with the exception of PK 06. The use of this naming system corresponds to the identifiers used in  
337 Sutherland et al. (2016), maintaining the correspondence of PK .1 or .2.

338 Most PKs were identifiable in the MAPCOMP analysis, with some notable exceptions for  
339 each coregonine species. In cisco, chromosome arms PK 22.2, 25.1 and 25.2 were unidentified;  
340 two of these arms (PK 25.1 25.2) were also unidentified in the European whitefish linkage map  
341 (De-Kayne and Feulner 2018). Additionally, it was difficult to determine correspondences for  
342 PK 09 and 23. In European whitefish, five chromosome arms were unidentifiable (i.e., PK 09.1,  
343 09.2, 23.2, 25.1 and 25.2), and there were homeology ambiguities for PK 02, as well as  
344 homology ambiguities for PK arm 05.2 (Table 2). In lake whitefish, five arms were  
345 unidentifiable (i.e., PK 09.2, 11.2, 20.2, 22.1, and 25.2), and there were homeology ambiguities  
346 for PK 02.2 and 06.2. In multiple species, arms where it was difficult to determine homologous  
347 relationships often had a high proportion of duplicated loci, presumably making distinguishing  
348 homologs and homeologs challenging. Nonetheless, most homologs and homeologs (42/50) were  
349 identified in all three coregonine species. This information was then leveraged to characterize the  
350 fusion/fission history within the Coregoninae lineage using the methods outlined in Sutherland et  
351 al. (2016).

352 The fusion/fission analysis indicated far fewer species-specific fusions than identified for  
353 salmonids in Sutherland et al. (2016), with most fusions occurring prior to the divergence of the  
354 coregonines (Figure 2). This difference in species-specific fusions may also be related to the  
355 general lower number of fusions in coregonines relative to *Salmo* and *Oncorhynchus*  
356 (Supplementary file S5); although, in the coregonines the majority of fusions were observed in  
357 more than one species, which was not observed in most other species previously characterized.  
358 Two strongly supported fusions were observed in all three coregonine species: fusions PK 05.1-  
359 06.1 and 10.2-24.1. PK 11.1-21.1 was fused in both cisco and European whitefish, which  
360 presumably underwent a fission in lake whitefish (Figure 2). The full characterization of fissions  
361 will require the resolution of those ambiguous arms that are considered as probable in the current  
362 analysis, and this may be further clarified in future work.

363 In summary, five fusions were likely shared among all three species, and one was shared  
364 between cisco and European whitefish (PK 11.1-21.1). Cisco had two species-specific fusions  
365 (PK 10.2-20.1 and 22.1-20.2), bringing the total count of observed fusions to eight. European  
366 whitefish had one species-specific fusion (PK 20.2-10.2), bringing the total count of observed  
367 fusions to seven. Lake whitefish also had one species-specific fusion (PK 20.1-23.2), bringing  
368 the total count to six. Interestingly, the PK 09.2-17.1 fusion that was originally proposed to be

369 shared among all known salmonids (Sutherland et al. 2016), was found not to be fused in any of  
370 the species here, suggesting either that this fusion occurred after the divergence of *Coregonus*  
371 from the ancestor of the rest of the salmonids, or that a fission occurred at the base of the  
372 coregonines (Figure 2).

373

### 374 *Homeolog identification, similarity, and inheritance mode*

375 A second major goal of this study was to compare homeologous relationships and modes  
376 of inheritance within and among species. We identified 17 of the 25 homeologous chromosome  
377 pairs (PK) in *cisco* using the markers that could be mapped to both homeologs in the linkage  
378 map, and each homeologous pair shared between one and 86 duplicated loci (Fig. 3,  
379 Supplementary file S6). Of the 17 homeolog pairs, six (PK 02, 06, 09, 11, 20, 23) had many loci  
380 (42-86) supporting homeology; these are six of the “magic eight” discussed above. The other 11  
381 had few markers supporting homeology (i.e., 1-6) and are not members of the “magic eight”. The  
382 other two arms found in the magic eight were not identifiable in *cisco*, potentially because they  
383 contained a large number of duplicated loci. All of the previously constructed linkage maps for  
384 salmonids that included duplicated regions had a large number of markers supporting homeology  
385 for the “magic eight” with the exception of pink salmon, where seven of the eight PKs had high  
386 support (34 – 68 loci) but one pair (PK25) displayed substantially lower support (nine loci)  
387 (Tarpey et al. 2017) (Figure 3, Supplementary file S6).

388 To better understand the genetic similarity between homeologs and infer inheritance  
389 mechanisms (i.e., residual tetrasomy or disomy), all 25 known homeologous relationships were  
390 compared in reference genomes for grayling, Atlantic salmon, Arctic char, rainbow trout, and  
391 Chinook salmon (Figures 3 and 4, Supplementary file S7). Using the machine learning algorithm  
392 (see Methods), the optimal  $k$  – nearest neighbor for each species was identified as five. Those  
393 five nearest neighbors from the training sets voted on the assignment of a particular PK to either  
394 putatively tetrasomic or disomic classes (Figure 4), and the proportion of votes supporting each  
395 assignment are reported in Supplemental Document S8. The highest observed vote proportion for  
396 assignment to a class is 4 of 5 as a result of the limit on training set size to four of each class and  
397 the five optimal  $k$  – nearest neighbors indicated for accuracy.

398 For Atlantic salmon and all *Oncorhynchus* spp. (i.e., rainbow trout and Chinook salmon),  
399 the same eight PKs (i.e., PK 01, 02, 09, 11, 20, 22, 23, 25) were classified as tetrasomic using the  
400 machine learning approach. This list of PKs includes all of those defined as LORes by Robertson  
401 et al. (2017), and one additional (i.e., PK 01), but does not include PK 06, which is considered to  
402 be part of the “magic eight” using linkage map evidence. Arctic char showed evidence for  
403 residual tetrasomy in seven of these eight PKs, with the exception of PK 11 (see below for  
404 details regarding this discrepancy due to other chromosome arms in this fusion). Grayling also  
405 shared seven of the eight residually tetraploid homeolog pairs, with the exception of PK 01. Most  
406 PKs received the highest possible vote proportions for their classifications (0.8), however, PK01  
407 in Atlantic salmon and rainbow trout demonstrated a lower vote proportion (0.6) (Figure 4,  
408 Supplemental Document S8), suggesting reduced support for this homeologous pair being

409 tetrasomic. Additionally, PK 19 in grayling, didn't have the highest vote proportion and was  
410 assigned as diploid but had the highest sequence similarity in that class (Figure 4, Supplemental  
411 Document S8). Sequence similarity was significantly higher for the tetrasomic PKs across all  
412 species ( $P < 0.0001$ ).

413 Although the group of tetrasomic PKs was largely conserved across species, there was  
414 substantial variation in the relative sequence similarity between these homeolog pairs (i.e., order  
415 of highest to lowest similarity) among species. PK 01 consistently displayed the lowest sequence  
416 similarity of all the PKs in all five species where it was classified as tetrasomic and did not  
417 always receive the highest observed vote proportion (see above). However, there were a number  
418 of other homeolog pairs that displayed highly variable sequence similarity rankings across  
419 species (Figure 4). For example, PK 09 had the highest sequence similarity in the grayling  
420 genome, the sixth highest in the rainbow trout genome, and the fourth or fifth highest in the other  
421 genomes. This variation suggests that the frequency of tetravalent meiosis for each PK may  
422 differ across species and that the process of diploidization has occurred in a species-specific  
423 manner post WGD as suggested in the mechanisms proposed by Robertson et al (2017).

424

## 425 Discussion

426 The amount of genomic resources available for salmonids has increased drastically over  
427 the last decade. However, many previous studies investigating genome evolution in salmonids  
428 focus on one or a few species, with fewer studies considering broader subsets of available taxa to  
429 understand patterns of genome evolution across the Salmonidae family (but see Sutherland et al.  
430 2016; Robertson et al. 2017). Here, we utilize genomic resources along with a newly generated  
431 high-density linkage map for cisco to compare patterns of homology, fusion/fission events,  
432 homeology, and residual tetrasomy across species. The cisco linkage map incorporates  
433 duplicated regions and contains 20,450 loci, making it denser than most RAD-based haploid  
434 linkage maps that have previously been constructed for salmonids (typically built from 3,000 to  
435 5,000 loci). Higher marker density helped identify orthologous relationships between  
436 coregonines and other salmonids as well as to identify homeologous chromosomes in cisco. We  
437 also demonstrate the use of the protokaryotype ID, defined here but first used in Sutherland et al.  
438 (2016), for comparative analyses in salmonids in order to unify and facilitate comparative  
439 approaches in salmonid linkage maps and chromosome-level assemblies. Comparisons across  
440 Salmonidae revealed that patterns of rediploidization are relatively similar across genera and  
441 loosely correspond with phylogeny. However, we did identify substantial variation in sequence  
442 similarity between homeologs both within species across homeolog pairs, and among species,  
443 suggesting that frequently used binary classifications such as AORe/LORe and "magic eight"  
444 may be oversimplified.

445

## 446 *Protokaryotype identifiers to facilitate comparative genomics in salmonids*

447 Comparative genomics within Salmonidae is important for the interpretation of the  
448 effects of rediploidization after WGD on genome evolution (e.g. Berthelot et al. 2014; Kodama

449 et al. 2014; Lien et al. 2016). However, most studies use independent naming schemes for each  
450 species, making it difficult to directly compare studies without complicated lookup tables or  
451 alignments to confirm homology (e.g. Brieuc et al. 2014; Kodama et al. 2014). Recently  
452 developed methods for connecting linkage maps through reference genomes (Sutherland et al.  
453 2016) facilitated description of homologous relationships for most or all linkage group arms  
454 across salmonids (with a few exceptions in coregonines). Additionally, Sutherland et al. (2016)  
455 and Savilammi et al. (2019) have explored the utility of naming chromosomes based on  
456 homology to northern pike, which as a representative of the non-duplicated sister lineage of  
457 salmonids can be used to represent the ancestral (pre-duplication) state of salmonid genomes.  
458 Each northern pike chromosome is represented by two homeologous chromosome arms in  
459 salmonids, which are designated with a .1 or .2 following the ancestral chromosome number.  
460 This naming system, if applied broadly, will facilitate comparative genomics in salmonids by  
461 creating a “Mueller element”-like system (reviewed in Schaeffer 2018), where each chromosome  
462 arm has a universal identifier. However, there also remains value in species-specific identifiers;  
463 for example, Cart03 is the third named linkage group in the Cisco linkage map (Table 2). By  
464 comparison, Cart03 named via the PK system could be Cart03 (PK 08.2-09.1) or Cart03<sub>PK08.2-09.1</sub>  
465 as Cart03 represents the fusion of two ancestral salmonid chromosome arms 08.2 and 09.1  
466 (Figure 1, Table 2).

467 The PK system allows for simple comparison across species and genera. A case study of  
468 the utility of this system is the comparison of the chromosome containing the sex determining  
469 gene in salmonids (sdY), which is known to move between chromosomes (see Table 1 in  
470 Sutherland et al. 2017). This comparison demonstrated that some chromosome arms more  
471 frequently contain the sex determining gene than would be expected by chance or explainable by  
472 phylogenetic conservation (i.e., PK 01.2 (AC04q), PK 03.1 (Cclu25, Co30, So09), PK 19.1  
473 (So09.5, AC04q.1), PK 15.1 (AC04q.2, BC35), Sutherland et al. 2017). Even more intriguing is  
474 that the northern pike naming was based on the threespine stickleback *Gasterosteus aculeatus*  
475 (Rondeau et al. 2014), and PK 19 is the sex determining chromosome in three spine stickleback  
476 (Peichel et al. 2004). As observed above, this chromosome is often fused with sex chromosomes  
477 in salmon (Sutherland et al. 2017). By comparison, using the naming system, it is easy to observe  
478 that LG24 in northern pike (i.e., PK 24 in salmon), recently identified to hold the sex  
479 determining gene in Northern pike (Pan et al. 2019), does not appear to contain the sex-  
480 determining locus in any tested salmonids. Deriving this information would be more difficult  
481 without the PK system and would require extensive cross-referencing.

482 Other applications for the PK naming system include facilitating comparisons of the  
483 correspondence of chromosomes containing genes for adaptive potential in sockeye salmon  
484 (So13<sub>PK18.2</sub>, TULP4, Larson et al. 2017), for run timing in Chinook (Ots28<sub>PK03.2</sub>, GREB1L,  
485 Prince et al. 2017), and for age-at-maturity in Atlantic salmon (Ssa25<sub>PK16.2</sub>, VGLL3, Barson et al.  
486 2015). While there may be some sections of the PK that are not always retained (e.g., some  
487 transposition of sections), as long as the majority of the chromosome is preserved, then the PK  
488 system enables general comparisons. The PK system proposed here will facilitate quick and

489 accurate comparisons across taxa, adding significant value to the myriad studies searching for  
490 adaptively important genes and regions in salmonids by leveraging comparative approaches.

491

#### 492 *Homology and fission/fusion history in coregonines*

493 Comparisons using linkage maps for three coregonine species, cisco, lake whitefish  
494 (Gagnaire et al. 2013), and European whitefish (De-Kayne and Feulner 2018), allowed us to  
495 assess homology and variation in karyotypes across the genus. Ambiguity in homologous  
496 relationships remained for at least five chromosome arms in all three coregonines; this degree of  
497 uncertainty was much higher than documented across the *Salmo*, *Oncorhynchus*, and *Salvelinus*  
498 genera by Sutherland et al. (2016), where there were only two ambiguities across these groups.  
499 Coregonines appear to have a number of relatively small acrocentric chromosomes (Phillips and  
500 Rab 2001), some of which contain a high degree of duplicated loci, making constructing linkage  
501 maps more difficult than for other salmonids (Gagnaire et al. 2013; De-Kayne and Feulner  
502 2018). For example, PK 25 has never been successfully mapped in coregonines, likely because it  
503 is small, submetacentric or acrocentric, and contains many duplicates. In other salmonids, where  
504 PK 25 is part of larger and/or metacentric chromosome, mapping becomes easier as there are  
505 many disomically inherited markers on the chromosome. Interestingly, the fact that PK 25  
506 displayed evidence of residual tetrasomy in cisco, even though it is likely an acrocentric or  
507 submetacentric chromosome, suggests that metacentric chromosomes are not required for  
508 homeologous recombination. This contradicts previous theory which suggests that homeologous  
509 recombination requires at least one chromosome arm to be metacentric (Kodama et al. 2014).  
510 Additionally, PK 25.2 in grayling is a submetacentric chromosome and also displays signals of  
511 residual tetrasomy (Savilammi et al. 2019), providing further evidence that a small secondary  
512 arm may be sufficient to facilitate tetrasomic meiosis.

513 The fusion history in coregonines differs substantially from many other members of the  
514 salmonid family. Members of the *Coregonus*, *Salvelinus*, and *Thymallus* genera possess the “A  
515 karyotype,” with a diploid chromosome number (2N) ~80 and many acrocentric chromosomes,  
516 whereas *Oncorhynchus* and *Salmo*, possess the “B karyotype,” with 2N ~60 and many  
517 metacentric chromosomes (Phillips and Rab 2001). Given that these both come from an ancestral  
518 type of n = 50 chromosome arms, species with the “A karyotype” have undergone fewer fusions  
519 than other lineages. Interestingly, it appears that “A karyotype” species also generally contain a  
520 lower proportion of species-specific fusions compared to “B karyotype” species, suggesting that  
521 the “B karyotype” status comes from species-specific fusions. Sutherland et al. (2016)  
522 investigated fusion history within many species from the *Oncorhynchus* genus and found that  
523 most species had many species-specific fusions (e.g., 17 species-specific fusions in pink salmon).  
524 However, Sutherland et al. (2016) only investigated one species from the *Coregonus* and  
525 *Salvelinus* genera as this was all that was available at the time of publication, and no species  
526 from *Thymallus*. Our current study is the first to investigate fusion history across multiple  
527 coregonines and illustrates that most fusions are shared among species in the *Coregonus* genus,  
528 contrasting the pattern observed in *Oncorhynchus* (Sutherland et al. 2016). The functional effect

529 of differing fusion histories is yet to be determined, and remains an important question  
530 differentiating species within the *Coregonus*, *Salvelinus*, and *Thymallus* genera from other  
531 salmonids. Further information from genome sequencing projects, for example the European  
532 whitefish genome (De Kayne et al. 2019) should facilitate important future studies contrasting  
533 genomic processes and structure in species with differing fusion histories.

534

#### 535 *Patterns of homeology and residual tetrasomy across salmonids*

536 Although patterns of residual tetrasomy were generally conserved, variation within and  
537 among species was observed when examining results from linkage maps versus reference  
538 genomes. Sequence similarity analyses using reference genomes suggested that all species  
539 showed evidence for residual tetrasomic inheritance in seven homeologous pairs (PK 02, 09, 11,  
540 20, 22, 23, and 25) with the exception of PK11 in Arctic char (see below). Using linkage maps,  
541 these same seven homeologous pairs have been found to be tetrasomic in *Oncorhynchus*  
542 (Kodama et al. 2014; McKinney et al. 2019), *Salvelinus* (Sutherland et al. 2016; Nugent et al.  
543 2017), *Salmo* (Robertson et al. 2017), and likely *Coregonus* (results reported herein), strongly  
544 suggesting that tetravalent meioses can and do form between these homeologs in all investigated  
545 species to date. However, evidence for residual tetrasomy differed between linkage maps and  
546 genomes for multiple PKs, most notably PK 06, which was classified as tetrasomic in linkage  
547 mapping studies but not in genome analyses, and PK 01 which was classified as tetrasomic in  
548 genome analyses but not linkage maps. It is likely that some of these differences are the result of  
549 methodological limitations of the current approach and point to future analysis approaches that  
550 may be able to improve upon the framework presented here. This is further described below.

551 The observation that PK11 did not display high sequence similarity in Arctic char might  
552 suggest a difference in diploidization rates in char compared to other salmonids for this  
553 homeologous pair, but it is more likely that methodological limitations prevented us from  
554 detecting residual tetrasomy, as a linkage map study in Arctic char found a high number of  
555 duplicated markers on this PK (Nugent et al. 2017). The percentage similarity analysis applied in  
556 the present study uses complete chromosome alignments and requires post-filtering to remove  
557 non-homeologous alignments. This method appears to be robust when chromosome arms are  
558 well defined but, PK 11 in Arctic char appears to be composed of four chromosome arms that  
559 have come together in a series of species-specific fusions (inferred from Christensen et al.  
560 2018b). Since arm boundaries were not well defined, alignments in this PK produced a wide  
561 interquartile range, suggesting that, while some regions of the PK are likely undergoing residual  
562 tetrasomy, the alignments may have masked these regions by integrating over multiple  
563 chromosome arms. This would be particularly problematic if the chromosomes being compared  
564 both contained non-target chromosomes that were homeologous. To improve upon the method  
565 applied here, better definition of the breaks between chromosome fusions could be applied and  
566 this could prevent such ambiguities or noise in the sequence similarity calculated. We therefore  
567 conclude that PK 11 is likely tetrasomic in Arctic char, but that we were unable to classify it as  
568 such due to methodological limitations. The sequence similarity method applied here is generally

569 robust, but the fusion history of the species being analyzed needs to be considered to avoid  
570 unexpected and erroneous similarity values. Ideally, only the section containing the ancestral  
571 chromosome of interest would be being compared between the homeologs. This is an avenue of  
572 method development that will be valuable for future work.

573 Contrastingly, the finding that PK 06 is not tetrasomic does not appear to be due to  
574 methodological limitations of our genome analysis but may be due to differences in estimating  
575 extent of residual tetraploidy between linkage mapping and genome assembly approaches.  
576 Linkage mapping in *Oncorhynchus* and *Salvelinus* consistently finds support for tetrasomic  
577 inheritance at PK 06 (Larson et al. 2017; Nugent et al. 2017), but the genome analysis conducted  
578 here and that conducted for rainbow trout (Campbell et al. 2019) found that this PK displayed  
579 intermediate sequence similarity consistent with disomic homeologs. One of the ways the two  
580 approaches differ is the length of the sequence used during each analysis. The genome analysis  
581 conducted here calculated similarity by using alignments of at least 1,000 bp, whereas linkage  
582 maps compare alleles within ~100-150 bp RADtags. The short sequences analyzed by software  
583 such as STACKs (Rochette and Catchen 2017; Rochette et al. 2019) make it possible to collapse  
584 sequences into a single locus that can be mapped at both paralogs, even when sequence  
585 divergence in a given region is relatively large. This therefore makes linkage maps a less  
586 conservative characterization method for determining residual tetrasomy. In addition, many  
587 genome assemblers applied to salmonid genomes (e.g. Chin et al. 2016; Koren et al. 2017; Ruan  
588 and Li 2019) are not optimized for paralogous regions in polyploid genomes. This could be  
589 especially problematic for genomes that combine both disomic and tetrasomic regions, such as in  
590 salmonids. The end results are that duplicated regions may be detected as single copies as a  
591 result of sequence collapse during the assembly process (Alkan et al. 2011; Varadharajan et al.  
592 2018). If sequences do not collapse during assembly, contigs might be fragmented and  
593 misassembled in the genome, making it difficult to differentiate between homologs and  
594 homeologs (Kyriakidou et al. 2018). This could lead to homeologous regions being missed  
595 altogether in genome sequences, particularly in comparisons that require chromosome-level  
596 assemblies. However, the fact that support for tetrasomic inheritance in other PKs identified as  
597 tetrasomic through linkage mapping was consistent with that observed in genome analysis  
598 strongly suggests that there is something unique with PK 06 rather than a fault with the genome  
599 analyses conducted here. Perhaps, as suggested by Campbell et al (2019), the PK 06  
600 chromosome arms are returning to a diploid state faster than the other seven tetrasomic  
601 homeolog pairs or the tetrasomically inherited portion of PK 06 is smaller than other tetrasomic  
602 PKs.

603 Another notable difference between linkage mapping and genome analysis was the  
604 consistent classification of PK 01 as tetrasomic in the genome analysis (five of six species) but  
605 not in any linkage map. PK 01 uniformly exhibited the least similarity between tetrasomic  
606 homeologous pairs and was assigned to the putatively tetrasomic class of PKs with less certainty  
607 by the machine learning algorithm. This suggests that PK 01 may have low levels of tetrasomy.  
608 We also observed some consistent patterns of variation in sequence similarity within disomic



609 markers. For example, homeolog pairs for PK 24 and 21 generally displayed the lowest sequence  
610 similarity, and homeolog pairs for PK 07 and 19 displayed higher similarity. Our study therefore  
611 presents additional nuances into the rediploidization process by identifying a core group of  
612 conserved tetrasomic homeologs, potentially intermediate homeologs (PK 01, 06) and  
613 consistently diverged homeologs (PK 21, 24). Future investigations can be refined to examine  
614 four well-defined categories across PKs: tetrasomic, intermediate, disomic, and most diverged.  
615 This enhanced refinement should reduce noise from the incorrect pooling of homeologs and aid  
616 in understanding the rediploidization process in salmonids.

617 Interestingly, more variation in sequence similarity was observed within tetrasomic  
618 homeologs than was observed in disomic homeologs. For example, PK 23 has the second highest  
619 sequence similarity in Arctic char, the fourth highest in rainbow trout, the sixth highest in  
620 Atlantic salmon, and the seventh highest in grayling. While this may be in part due to differences  
621 in genome assembly method and quality, the fact that variation exists even among the highest  
622 quality genomes (Atlantic salmon and rainbow trout) suggests that rediploidization rates at  
623 tetrasomic PKs may vary among species, even though the same seven PKs are consistently  
624 classified as tetrasomic. In other words, although there appears to be a large amount of  
625 conservation of tetrasomic inheritance between species, our genome analyses also suggest some  
626 independence in the return to disomy since the three subfamilies of salmonid split ~ 50MYA.

## 627 628 *Conclusions*

629 Here we provide the most complete analysis of chromosomal rearrangements in  
630 Coregonine using the currently available genomic resources as well and a newly developed  
631 haploid linkage map for cisco. We also suggest a naming system, PK, to facilitate a comparative  
632 analysis of all currently available salmonid genomes and linkage maps. Our study revealed that  
633 patterns of tetrasomic inheritance are largely conserved across the salmonids, but that there is  
634 substantial variation in these patterns both within and among species. For example, while the  
635 same seven PKs appear to be tetrasomically inherited across all species examined, their relative  
636 rates of sequence similarity differ within species, suggesting the potential of independent  
637 evolutionary trajectories following speciation. Additionally, we documented that analyses based  
638 on linkage maps do not identify the same tetrasomically inherited PKs as genome analyses and  
639 postulate that this may be due to inconsistencies with genome assemblies or due to differences  
640 the length of sequence used in comparisons. When inferring genomic patterns, more robust  
641 results can be obtained by using comparative approaches as opposed to a single resource. We  
642 therefore urge researchers to be cautious when inferring patterns based on a single resource and  
643 to integrate across resources when possible. In conclusion, our study presents important insights  
644 about the WGD in salmon and also provides a framework that can be built upon to improve our  
645 understanding of WGDs both within and beyond salmonids.

## 646 647 **Acknowledgements**

648 This project was funded by the Great Lakes Restoration Initiative (GLRI). Special thanks to the  
649 USFWS crew members Chris Olds, Paul Haver, Kaley Genther, Steve Nimcheski, and Matt  
650 McLean for assistance in field sampling, USGS Great Lakes Science Center Aquatic Research  
651 Wet Lab for egg rearing, the University of Wisconsin- Stevens Point Molecular Conservation  
652 Genetics Lab for assistance in lab work, and the support of the Turing High Performance  
653 Computing cluster at Old Dominion University. Thanks to Kris Christensen and Eric Rondeau  
654 for valuable and constructive comments on the manuscript. Any use of trade, product, or  
655 company name is for descriptive purposes only and does not imply endorsement by the U.S.  
656 Government.

657

### 658 **Code Availability**

659 Linkage mapping: <https://github.com/DaniBlumstein/Cisco-Linkage-Map>

660 MapComp: [https://github.com/bensutherland/coregonus\\_mapcomp](https://github.com/bensutherland/coregonus_mapcomp)

661 Genome homeology relationships: <https://github.com/MacCampbell/residual-tetrasomy>

662

663

664 **References**

- 665 Ali OA, et al. 2016. RAD Capture (Rapture): Flexible and Efficient Sequence-Based  
666 Genotyping. *Genetics* 202: 389-400. doi: 10.1534/genetics.115.183665
- 667 Alkan C, Sajjadian S, Eichler EE 2011. Limitations of next-generation genome sequence  
668 assembly. *Nat Methods* 8: 61-65. doi: 10.1038/nmeth.1527
- 669 Allendorf FW, et al. 2015. Effects of crossovers between homeologs on inheritance and  
670 population genomics in polyploid-derived salmonid fishes. *J Hered* 106: 217-227. doi:  
671 10.1093/jhered/esv015
- 672 Allendorf FW, Danzmann RG 1997. Secondary Tetrasomic Segregation of MDH-B and  
673 Preferential Pairing of Homeologues in Rainbow Trout. *Genetics* 145: 1083-1092.
- 674 Allendorf, FW, Thorgaard GH 1984. Tetraploidy and the evolution of salmonid  
675 fishes. *Evolutionary genetics of fishes*. Springer, Boston, MA. 1-53.
- 676 Angers B, Bernatchez L, Angers A, Desgroseillers L 1995. Specific microsatellite loci for brook  
677 charr reveal strong population subdivision on a microgeographic scale. *Journal of Fish Biology*  
678 47: 177-185.
- 679 Arrigo N, Barker MS 2012. Rarely successful polyploids and their legacy in plant genomes. *Curr*  
680 *Opin Plant Biol* 15: 140-146. doi: 10.1016/j.pbi.2012.03.010
- 681 Barson NJ, et al. 2015. Sex-dependent dominance at a single locus maintains variation in age at  
682 maturity in salmon. *Nature* 528: 405-408. doi: 10.1038/nature16062
- 683 Berthelot C, et al. 2014. The rainbow trout genome provides novel insights into evolution after  
684 whole-genome duplication in vertebrates. *Nature communications* 5: 3657. doi:  
685 10.1038/ncomms4657
- 686 Briec MS, Waters CD, Seeb JE, Naish KA 2014. A dense linkage map for Chinook salmon  
687 (*Oncorhynchus tshawytscha*) reveals variable chromosomal divergence after an ancestral whole  
688 genome duplication event. *G3 (Bethesda)* 4: 447-460. doi: 10.1534/g3.113.009316
- 689 Campbell MA, Hale MC, McKinney GJ, Nichols KM, Pearse DE 2019. Long-Term  
690 Conservation of Ohnologs Through Partial Tetrasomy Following Whole-Genome Duplication in  
691 Salmonidae. *G3 (Bethesda)* 9: 2017-2028. doi: 10.1534/g3.119.400070
- 692 Campbell MA, Lopez JA, Sado T, Miya M 2013. Pike and salmon as sister taxa: detailed  
693 intraclade resolution and divergence time estimation of Esociformes + Salmoniformes based on  
694 whole mitochondrial genome sequences. *Gene* 530: 57-65. doi: 10.1016/j.gene.2013.07.068

- 695 Chin CS, et al. 2016. Phased diploid genome assembly with single-molecule real-time  
696 sequencing. *Nat Methods* 13: 1050-1054. doi: 10.1038/nmeth.4035
- 697 Chourrout D 1982. Gynogenesis caused by ultraviolet irradiation of salmonid sperm. *Journal of*  
698 *Experimental Zoology* 223: 175-181.
- 699 Christensen KA, et al. 2018a. Chinook salmon (*Oncorhynchus tshawytscha*) genome and  
700 transcriptome. *PLoS One* 13: e0195461. doi: 10.1371/journal.pone.0195461
- 701 Christensen KA, et al. 2018b. The Arctic charr (*Salvelinus alpinus*) genome and transcriptome  
702 assembly. *PLoS One* 13: e0204076. doi: 10.1371/journal.pone.0204076
- 703 Clarke JT, Lloyd GT, Friedman M 2016. Little evidence for enhanced phenotypic evolution in  
704 early teleosts relative to their living fossil sister group. *Proc Natl Acad Sci U S A* 113: 11531-  
705 11536. doi: 10.1073/pnas.1607237113
- 706 Crete-Lafreniere A, Weir LK, Bernatchez L 2012. Framing the Salmonidae family phylogenetic  
707 portrait: a more complete picture from increased taxon sampling. *PLoS One* 7: e46662. doi:  
708 10.1371/journal.pone.0046662
- 709 Danecek P, et al. 2011. The variant call format and VCFtools. *Bioinformatics* 27: 2156-2158.  
710 doi: 10.1093/bioinformatics/btr330
- 711 De-Kayne R, Feulner PGD 2018. A European Whitefish Linkage Map and Its Implications for  
712 Understanding Genome-Wide Synteny Between Salmonids Following Whole Genome  
713 Duplication. *G3 (Bethesda)* 8: 3745-3755. doi: 10.1534/g3.118.200552
- 714 De-Kayne R, Zoller S, Feulner, PG 2019 A de novo chromosome-level genome assembly  
715 of *Coregonus* sp. “Balchen”: one representative of the Swiss Alpine whitefish radiation. *bioRxiv*  
716 doi: 10.1101/771600
- 717 Gagnaire PA, Normandeau E, Pavey SA, Bernatchez L 2013. Mapping phenotypic, expression  
718 and transmission ratio distortion QTL using RAD markers in the Lake Whitefish (*Coregonus*  
719 *clupeaformis*). *Mol Ecol* 22: 3036-3048. doi: 10.1111/mec.12127
- 720 Gerstein AC, Otto SP 2009. Ploidy and the causes of genomic evolution. *Journal of Heredity*  
721 100: 571-581. doi:10.1093/jhered/esp057
- 722 Harris RS 2007. Improved pairwise alignment of genomic DNA. The Pennsylvania State  
723 University.
- 724 Hollister JD 2015. Polyploidy: adaptation to the genomic environment. *New Phytologist* 205:  
725 1034-1039. doi: 10.1111/nph.12939

- 726 Karine Alix et al. 2017. Polyploidy and interspecific hybridization: partners for adaptation,  
727 speciation and evolution in plants, *Annals of Botany*, 120: 183-194,  
728 <https://doi.org/10.1093/aob/mcx079>
- 729 Kodama M et al. 2014. Comparative mapping between Coho Salmon (*Oncorhynchus kisutch*)  
730 and three other salmonids suggests a role for chromosomal rearrangements in the retention of  
731 duplicated regions following a whole genome duplication event. *G3 (Bethesda)* 4: 1717-1730.  
732 doi: 10.1534/g3.114.012294
- 733 Koren S et al. 2017. Canu: scalable and accurate long-read assembly via adaptive k-mer  
734 weighting and repeat separation. *Genome Res* 27: 722-736. doi: 10.1101/gr.215087.116
- 735 Kuhn M 2019. caret: Classification and Regression Training. R package version 6.0-84.
- 736 Kyriakidou M, Tai HH, Anglin NL, Ellis D, Stromvik MV 2018. Current Strategies of Polyploid  
737 Plant Genome Sequence Assembly. *Front Plant Sci* 9: 1660. doi: 10.3389/fpls.2018.01660
- 738 Larson WA, et al. 2017. Genomic islands of divergence linked to ecotypic variation in sockeye  
739 salmon. *Mol Ecol* 26: 554-570. doi: 10.1111/mec.13933
- 740 Larson WA, et al. 2015. Identification of Multiple QTL Hotspots in Sockeye Salmon  
741 (*Oncorhynchus nerka*) Using Genotyping-by-Sequencing and a Dense Linkage Map. *J Hered*  
742 107: 122-133. doi: 10.1093/jhered/esv099
- 743 Lien S, et al. 2016. The Atlantic salmon genome provides insights into rediploidization. *Nature*  
744 533: 200-205. doi: 10.1038/nature17164
- 745 Limborg MT, McKinney GJ, Seeb LW, Seeb JE 2016a. Recombination patterns reveal  
746 information about centromere location on linkage maps. *Mol Ecol Resour* 16: 655-661. doi:  
747 10.1111/1755-0998.12484
- 748 Limborg MT, Seeb LW, Seeb JE 2016b. Sorting duplicated loci disentangles complexities of  
749 polyploid genome masked by genotyping by sequencing. *Molecular ecology* 25: 2117–2129.
- 750 Macqueen DJ, Johnston IA 2014. A well-constrained estimate for the timing of the salmonid  
751 whole genome duplication reveals major decoupling from species diversification. *Proc Biol Sci*  
752 281: 20132881. doi: 10.1098/rspb.2013.2881
- 753 Mayrose I, et al. 2015. Methods for studying polyploid diversification and the dead end  
754 hypothesis: a reply to Soltis et al. (2014). *New Phytologist* 206: 27-35. doi: 10.1111/nph.13192
- 755 Mayrose I, et al. 2011. Recently formed polyploid plants diversify at lower rates. *Science* 333:  
756 1257. doi: 10.1126/science.1207205

- 757 McKinney GJ, et al. 2016. An integrated linkage map reveals candidate genes underlying  
758 adaptive variation in Chinook salmon (*Oncorhynchus tshawytscha*). *Mol Ecol Resour* 16: 769-  
759 783. doi: 10.1111/1755-0998.12479
- 760 McKinney G et al. 2017. Paralogs are revealed by proportion of heterozygotes and deviations in  
761 read ratios in genotyping-by-sequencing data from natural populations. *Mol Ecol Resour*, 17:  
762 656-669. doi:10.1111/1755-0998.12613
- 763 McKinney GJ, et al. 2019. Dense SNP panels resolve closely related Chinook salmon  
764 populations. *Canadian Journal of Fisheries and Aquatic Sciences*. doi: 10.1139/cjfas-2019-0067
- 765
- 766 Norden CR 1961. Comparative osteology of representative salmonid fishes, with particular  
767 reference to the grayling (*Thymallus arcticus*) and its phylogeny. *Journal of the Fisheries Board*  
768 *of Canada* 18: 679-791.
- 769 Nugent CM, Easton AA, Norman JD, Ferguson MM, Danzmann RG 2017. A SNP Based  
770 Linkage Map of the Arctic Charr (*Salvelinus alpinus*) Genome Provides Insights into the  
771 Diploidization Process After Whole Genome Duplication. *G3 (Bethesda)* 7: 543-556. doi:  
772 10.1534/g3.116.038026
- 773 Ohno S 1970. *Evolution by gene duplication*: Springer Science & Business Media.
- 774 Ohta T 1989. Role of gene duplication in evolution. *Genome*, 31(1), 304-310. doi:10.1139/g89-  
775 048
- 776 Pan Q et al. 2019. Identification of the master sex determining gene in Northern pike (*Esox*  
777 *lucius*) reveals restricted sex chromosome differentiation. *PLoS Genet* 15: e1008013. doi:  
778 10.1371/journal.pgen.1008013
- 779 Patton JC, Gallaway BJ, Fechhelm RG, Cronin MA 1997. Genetic variation of microsatellite and  
780 mitochondrial DNA markers in broad whitefish (*Coregonus nasus*) in the Colville and  
781 Sagavanirktok rivers in northern Alaska. *Canadian Journal of Fisheries and Aquatic Sciences* 54:  
782 1548-1556. doi: 10.1139/f97-062
- 783 Pearse DE, et al. 2018. Sex-dependent dominance maintains migration supergene in rainbow  
784 trout. *bioRxiv* (2018): 504621. doi: 10.1101/504621
- 785 Peichel CL, et al. 2004. The master sex-determination locus in threespine sticklebacks is on a  
786 nascent Y chromosome. *Current biology* 16: 1416-1424. doi: 10.1016/j.cub.2004.08.030
- 787 Phillips R, Rab P 2001. Chromosome evolution in the Salmonidae (Pisces): an update. *Biological*  
788 *Reviews* 76: 1-25. doi: 10.1017/S1464793100005613

- 789 Phillips RB, Reed KM, Ráb P 1996. Revised karyotypes and chromosome banding of coregonid  
790 fishes from the Laurentian Great Lakes. *Canadian Journal of Zoology* 74: 323-329. doi:  
791 10.1139/z96-040
- 792 Prince DJ, et al. 2017. The evolutionary basis of premature migration in Pacific salmon  
793 highlights the utility of genomics for informing conservation. *Science advances* 3: e1603198.  
794 doi: 10.1126/sciadv.1603198
- 795 Python Software Foundation version 2.7. Python Language Reference, Available at  
796 <http://www.python.org>.
- 797 R Core Team 2018. R: A language and environment for statistical computing. Vienna, Austria: R  
798 Foundation for Statistical Computing.
- 799 Rastas P 2017. Lep-MAP3: robust linkage mapping even for low-coverage whole genome  
800 sequencing data. *Bioinformatics* 33: 3726-3732. doi: 10.1093/bioinformatics/btx494
- 801 Rastogi S, Liberles DA 2005. Subfunctionalization of duplicated genes as a transition state to  
802 neofunctionalization. *BMC Evolutionary Biology* 5: 28. doi:10.1186/1471-2148-5-28
- 803 Ripley B, Venables W 2019. class: Functions for Classification. R package version 7.3-15.
- 804 Robertson FM, et al. 2017. Lineage-specific rediploidization is a mechanism to explain time-lags  
805 between genome duplication and evolutionary diversification. *Genome Biol* 18: 111. doi:  
806 10.1186/s13059-017-1241-z
- 807 Rochette NC, Catchen JM 2017. Deriving genotypes from RAD-seq short-read data using  
808 Stacks. *Nat Protoc* 12: 2640-2659. doi: 10.1038/nprot.2017.123
- 809 Rochette NC, Rivera-Colón AG, Catchen JM 2019. Stacks 2: Analytical Methods for Paired-end  
810 Sequencing Improve RADseq-based Population Genomics. bioRxiv: 615385. doi:  
811 10.1101/615385
- 812 Rogers SM, Marchand M-H, Bernatchez L 2004. Isolation, characterization and cross-salmonid  
813 amplification of 31 microsatellite loci in the lake whitefish (*Coregonus clupeaformis*, Mitchill).  
814 *Molecular Ecology Notes* 4: 89-92. doi: 10.1046/j.1471-8286.2003.00578.x
- 815 Rondeau EB, et al. 2014. The genome and linkage map of the northern pike (*Esox lucius*):  
816 conserved synteny revealed between the salmonid sister group and the Neoteleostei. *PLoS One*  
817 9: e102089. doi: 10.1371/journal.pone.0102089
- 818 Ruan J, Li H 2019. Fast and accurate long-read assembly with wtdbg2. bioRxiv: 530972. doi:  
819 10.1101/530972
- 820 Sakamoto T, et al. 2000. A Microsatellite Linkage Map of Rainbow Trout (*Oncorhynchus*  
821 *mykiss*) Characterized by Large Sex-Specific Differences in Recombination Rates. *Genetics* 155:  
822 1331–1345.

- 823 Santini F, Harmon LJ, Carnevale G, Alfaro ME 2009. Did genome duplication drive the origin of  
824 teleosts? A comparative study of diversification in ray-finned fishes. *BMC Evol Biol* 9: 194. doi:  
825 10.1186/1471-2148-9-194
- 826 Savilammi T, et al. 2019. The Chromosome-Level Genome Assembly of European Grayling  
827 Reveals Aspects of a Unique Genome Evolution Process Within Salmonids. *G3 (Bethesda)* 9:  
828 1283-1294. doi: 10.1534/g3.118.200919
- 829 Schaeffer SW 2018. Muller "Elements" in *Drosophila*: How the Search for the Genetic Basis for  
830 Speciation Led to the Birth of Comparative Genomics. *Genetics* 210: 3-13. doi:  
831 10.1534/genetics.118.301084
- 832 Schwager EE, et al. 2017. The house spider genome reveals an ancient whole-genome  
833 duplication during arachnid evolution. *BMC Biol* 15: 62. doi: 10.1186/s12915-017-0399-x
- 834 Selmecki AM, et al. 2015. Polyploidy can drive rapid adaptation in yeast. *Nature* 519: 349-352.  
835 doi: 10.1038/nature14187
- 836 Sutherland BJB, et al. 2016. Salmonid Chromosome Evolution as Revealed by a Novel Method  
837 for Comparing RADseq Linkage Maps. *Genome Biol Evol* 8: 3600-3617. doi:  
838 10.1093/gbe/evw262
- 839 Sutherland BJB, Rico C, Audet C, Bernatchez L 2017. Sex Chromosome Evolution,  
840 Heterochiasmy, and Physiological QTL in the Salmonid Brook Charr *Salvelinus fontinalis*. *G3*  
841 (Bethesda) 7: 2749-2762. doi: 10.1534/g3.117.040915
- 842 Tarpey CM, Seeb JE, McKinney GJ, Seeb LW 2017. A dense linkage map for odd-year lineage  
843 pink salmon incorporating duplicated loci. In. Alaska Department of Fish and Game: School of  
844 Aquatic and Fishery Sciences, University of Washington. p. 1-50.
- 845 Taylor JS, Braasch I, Frickey T, Meyer A, Van de Peer Y 2003. Genome duplication, a trait  
846 shared by 22000 species of ray-finned fish. *Genome Res* 13: 382-390. doi: 10.1101/gr.640303
- 847 Van de Peer Y, Mizrachi E, Marchal K 2017. The evolutionary significance of polyploidy. *Nat*  
848 *Rev Genet* 18: 411-424. doi: 10.1038/nrg.2017.26
- 849 Vanneste K, Maere S, Van de Peer Y 2014. Tangled up in two: a burst of genome duplications at  
850 the end of the Cretaceous and the consequences for plant evolution. *Philos Trans R Soc Lond B*  
851 *Biol Sci* 369. doi: 10.1098/rstb.2013.0353



- 852 Varadharajan S, et al. 2018. The Grayling Genome Reveals Selection on Gene Expression  
853 Regulation after Whole-Genome Duplication. *Genome Biol Evol* 10: 2785-2800. doi:  
854 10.1093/gbe/evy201
- 855 Waples RK, Seeb LW, Seeb JE 2016. Linkage mapping with paralogs exposes regions of  
856 residual tetrasomic inheritance in chum salmon (*Oncorhynchus keta*). *Mol Ecol Resour* 16: 17-  
857 28. doi: 10.1111/1755-0998.12394
- 858 Wendel JF. 2000. Genome evolution in polyploids. In. *Plant molecular evolution*: Springer. p.  
859 225-249.
- 860 Wittbrodt K, Meyer A, Schartl M 1998. More genes in fish? *BioEssays* 20: 511-515. doi:  
861 10.1002/(sici)1521-1878(199806)20:6<511::Aid-bies10>3.0.Co;2-3
- 862 Wolfe KH 2001. Yesterday's polyploids and the mystery of diploidization. *Nature reviews*  
863 *genetics* 2: 333.
- 864 Wood TE, et al. 2009. The frequency of polyploid speciation in vascular plants. *Proc Natl Acad*  
865 *Sci U S A* 106: 13875-13879. doi: 10.1073/pnas.0811575106
- 866 Zhan SH, Glick L, Tsigonopoulos CS, Otto SP, Mayrose I 2014. Comparative analysis reveals  
867 that polyploidy does not decelerate diversification in fish. *J Evol Biol* 27: 391-403. doi:  
868 10.1111/jeb.12308

**Table 1.** Results for the female and male cisco linkage maps. Duplicated and singleton loci are from the female linkage map, and % duplicated is the percentage of duplicated loci on each female linkage group (LG). LG type is denoted with acrocentric (A) and metacentric (M).

| Cisco LG | Duplicated Loci | Singleton Loci | % Duplicated | Length      |           | Total Loci |      | Loci/cM |      | LG Type |
|----------|-----------------|----------------|--------------|-------------|-----------|------------|------|---------|------|---------|
|          |                 |                |              | Female (cM) | Male (cM) | Female     | Male | Female  | Male |         |
| Cart1    | 212             | 510            | 0.42         | 101.35      | 87.14     | 722        | 224  | 7.12    | 2.57 | M       |
| Cart2    | 394             | 384            | 1.03         | 97.77       | 61.11     | 778        | 159  | 7.96    | 2.6  | M       |
| Cart3    | 226             | 477            | 0.47         | 93.56       | 78.98     | 703        | 248  | 7.51    | 3.14 | M       |
| Cart4    | 48              | 547            | 0.09         | 92.45       | 67.80     | 595        | 194  | 6.44    | 2.86 | M       |
| Cart5    | 283             | 584            | 0.48         | 91.73       | 58.07     | 867        | 219  | 9.45    | 3.77 | M       |
| Cart6    | 108             | 729            | 0.15         | 91.36       | 68.95     | 837        | 278  | 9.16    | 4.03 | M       |
| Cart7    | 189             | 496            | 0.38         | 57.72       | 60.40     | 685        | 204  | 11.87   | 3.38 | M       |
| Cart8    | 189             | 532            | 0.36         | 57.56       | 51.62     | 721        | 170  | 12.53   | 3.29 | M       |
| Cart9    | 238             | 271            | 0.88         | 64.53       | 44.47     | 509        | 92   | 7.89    | 2.07 | A       |
| Cart10   | 21              | 488            | 0.04         | 63.98       | 49.68     | 509        | 152  | 7.96    | 3.06 | A       |
| Cart11   | 38              | 510            | 0.07         | 63.72       | 49.41     | 548        | 165  | 8.6     | 3.34 | A       |
| Cart12   | 393             | 177            | 2.22         | 63.18       | 74.69     | 570        | 80   | 9.02    | 1.07 | A       |
| Cart13   | 27              | 558            | 0.05         | 62.90       | 53.67     | 585        | 181  | 9.3     | 3.37 | A       |
| Cart14   | 73              | 454            | 0.16         | 62.66       | 59.74     | 527        | 140  | 8.41    | 2.34 | A       |
| Cart15   | 96              | 318            | 0.30         | 62.45       | 48.26     | 414        | 121  | 6.63    | 2.51 | A       |
| Cart16   | 24              | 456            | 0.05         | 62.25       | 45.80     | 480        | 153  | 7.71    | 3.34 | A       |
| Cart17   | 27              | 478            | 0.06         | 62.25       | 53.19     | 505        | 160  | 8.11    | 3.01 | A       |
| Cart18   | 25              | 446            | 0.06         | 62.16       | 42.08     | 471        | 136  | 7.58    | 3.23 | A       |
| Cart19   | 29              | 541            | 0.05         | 61.85       | 75.08     | 570        | 213  | 9.22    | 2.84 | A       |
| Cart20   | 31              | 536            | 0.06         | 60.19       | 48.36     | 567        | 224  | 9.42    | 4.63 | A       |
| Cart21   | 31              | 388            | 0.08         | 59.04       | 61.23     | 419        | 142  | 7.1     | 2.32 | A       |

|          |       |        |      |         |         |        |       |        |      |   |
|----------|-------|--------|------|---------|---------|--------|-------|--------|------|---|
| Cart22   | 20    | 544    | 0.04 | 58.96   | 49.49   | 564    | 204   | 9.57   | 4.12 | A |
| Cart23   | 52    | 473    | 0.11 | 58.57   | 55.39   | 525    | 162   | 8.96   | 2.92 | A |
| Cart24   | 13    | 556    | 0.02 | 58.38   | 57.23   | 569    | 195   | 9.75   | 3.41 | A |
| Cart25   | 26    | 458    | 0.06 | 58.28   | 51.08   | 484    | 161   | 8.3    | 3.15 | A |
| Cart26   | 30    | 445    | 0.07 | 58.09   | 50.91   | 475    | 147   | 8.18   | 2.89 | A |
| Cart27   | 32    | 499    | 0.06 | 58.00   | 60.69   | 531    | 213   | 9.16   | 3.51 | A |
| Cart28   | 27    | 444    | 0.06 | 57.79   | 54.44   | 471    | 141   | 8.15   | 2.59 | A |
| Cart29   | 15    | 404    | 0.04 | 57.78   | 62.64   | 419    | 149   | 7.25   | 2.38 | A |
| Cart30   | 29    | 384    | 0.08 | 57.76   | 71.50   | 413    | 141   | 7.15   | 1.97 | A |
| Cart31   | 25    | 541    | 0.05 | 56.93   | 77.82   | 566    | 184   | 9.94   | 2.36 | A |
| Cart32   | 19    | 478    | 0.04 | 56.56   | 75.17   | 497    | 177   | 8.79   | 2.35 | A |
| Cart33   | 20    | 460    | 0.04 | 56.37   | 49.57   | 480    | 146   | 8.52   | 2.95 | A |
| Cart34   | 262   | 82     | 3.20 | 55.54   | 83.66   | 344    | 62    | 6.19   | 0.74 | A |
| Cart35   | 42    | 254    | 0.17 | 54.74   | 40.54   | 296    | 81    | 5.41   | 2    | A |
| Cart36   | 19    | 332    | 0.06 | 54.45   | 45.50   | 351    | 117   | 6.45   | 2.57 | A |
| Cart37   | 25    | 402    | 0.06 | 53.16   | 55.82   | 427    | 122   | 8.03   | 2.19 | A |
| Cart38   | 25    | 431    | 0.06 | 50.97   | 73.21   | 456    | 171   | 8.95   | 2.34 | A |
| Cart39   | 0     | 0      | 0.00 | 0.00    | 45.13   | 0      | 41    | 0      | 0.91 | A |
| Cart40   | 0     | 0      | 0.00 | 0.00    | 58.46   | 0      | 71    | 0      | 1.21 | A |
| Averages | 89.03 | 449.13 | 0.20 | 64.66   | 58.95   | 538.16 | 158.5 | 8.36   |      |   |
| Total    | 3383  | 17067  | 0.20 | 2456.98 | 2357.98 | 20450  | 6340  | 317.71 |      |   |

---

**Table 2.** MAPCOMP results documenting homologous chromosomes for the three coregonines; cisco, lake whitefish (Gagnaire et al. 2013), and European whitefish (De-Kayne and Feulner 2018), integrated with Atlantic salmon (Lien et al. 2016), brook trout (Sutherland et al. 2016), and Chinook salmon (Briec et al. 2014). Homologous chromosomes for all species are named according to the corresponding Northern Pike linkage group as a reference (Rondeau et al. 2014), as per Sutherland et al. (2016), here termed protokaryotype ID (PK). ^ indicates weak evidence and \* indicates uncertainty between homeologs.

| <b>Northern Pike (PK)</b> | <b>Cisco</b> | <b>European Whitefish</b> | <b>Lake Whitefish</b> | <b>Brook Trout</b> | <b>Atlantic Salmon</b> | <b>Chinook Salmon</b> |
|---------------------------|--------------|---------------------------|-----------------------|--------------------|------------------------|-----------------------|
| 1.1                       | Cart23       | Calb16                    | Cclu28                | Sf25               | Ssa20b                 | Ots13q                |
| 1.2                       | Cart14       | Calb33                    | Cclu35                | Sf38               | Ssa09c                 | Ots14q                |
| 2.1                       | Cart01a      | Calb02b^*                 | Cclu04a               | Sf06a              | Ssa26                  | Ots04q                |
| 2.2                       | Cart12       | Calb02b^*                 | Cclu04a^*             | Sf28               | Ssa11a                 | Ots12q                |
| 3.1                       | Cart25       | Calb19                    | Cclu25                | Sf22               | Ssa14a                 | Ots10q                |
| 3.2                       | Cart26       | Calb22                    | Cclu26                | Sf11               | Ssa03a                 | Ots28                 |
| 4.1                       | Cart30       | Calb29                    | Cclu16                | Sf33               | Ssa09b                 | Ots08q                |
| 4.2                       | Cart21       | Calb30                    | Cclu29                | Sf07b              | Ssa05a                 | Ots21                 |
| 5.1                       | Cart06b      | Calb01a                   | Cclu05a               | Sf01a              | Ssa19b                 | Ots24                 |
| 5.2                       | Cart18       | Calb35 or Calb40          | Cclu15                | Sf27               | Ssa28                  | Ots25                 |
| 6.1                       | Cart06a      | Calb01b                   | Cclu05b               | Sf01b              | Ssa01b                 | Ots01q                |
| 6.2                       | Cart15       | Calb27                    | Cclu05b^*             | Sf36               | Ssa18a                 | Ots06q                |
| 7.1                       | Cart20       | Calb06                    | Cclu13                | Sf08b              | Ssa13b                 | Ots09p                |
| 7.2                       | Cart19       | Calb07                    | Cclu08                | Sf09               | Ssa04b                 | Ots30                 |
| 8.1                       | Cart27       | Calb17                    | Cclu36                | Sf04a              | Ssa23                  | Ots01p                |
| 8.2                       | Cart03a      | Calb08                    | Cclu06a               | Sf17               | Ssa10a                 | Ots05q                |
| 9.1                       | Cart03b*     | missing                   | Cclu06b               | Sf42               | Ssa02b                 | Ots32                 |
| 9.2                       | Cart34*      | missing                   | missing               | Sf03b              | Ssa12a                 | Ots02q                |
| 10.1                      | Cart08a      | Calb20b                   | Cclu10                | Sf23               | Ssa27                  | Ots13p                |
| 10.2                      | Cart04b      | Calb09a                   | Cclu24a               | Sf34               | Ssa14b                 | Ots31                 |
| 11.1                      | Cart05a      | Calb13b                   | Cclu18                | Sf14               | Ssa06a                 | Ots27                 |
| 11.2                      | Cart09       | Calb34                    | missing               | Sf08a              | Ssa03b                 | Ots09q                |
| 12.1                      | Cart33       | Calb14                    | Cclu27                | Sf18               | Ssa13a                 | Ots22                 |
| 12.2                      | Cart16       | Calb28                    | Cclu14                | Sf30               | Ssa15b                 | Ots16q                |
| 13.1                      | Cart17       | Calb25                    | Cclu34                | Sf06b              | Ssa24                  | Ots04p                |
| 13.2                      | Cart32       | Calb31                    | Cclu37                | Sf40               | Ssa20a                 | Ots12p                |
| 14.1                      | Cart01b      | Calb02a                   | Cclu04b               | Sf13               | Ssa01c                 | Ots20                 |
| 14.2                      | Cart38       | Calb11                    | Cclu33                | Sf10               | Ssa11b                 | Ots33                 |

|             |           |         |                   |       |        |        |
|-------------|-----------|---------|-------------------|-------|--------|--------|
| <b>15.1</b> | Cart10    | Calb18  | Cclu31            | Sf35  | Ssa09a | Ots08p |
| <b>15.2</b> | Cart31    | Calb10  | Cclu22            | Sf12  | Ssa01a | Ots11q |
| <b>16.1</b> | Cart07a   | Calb03b | Cclu02b or Cclu03 | Sf26  | Ssa21  | Ots26  |
| <b>16.2</b> | Cart28    | Calb21  | Cclu32            | Sf24  | Ssa25  | Ots03q |
| <b>17.1</b> | Cart24    | Calb05  | Cclu38            | Sf03a | Ssa12b | Ots02p |
| <b>17.2</b> | Cart22    | Calb12  | Cclu21            | Sf21  | Ssa22  | Ots07q |
| <b>18.1</b> | Cart29    | Calb24  | Cclu40            | Sf19  | Ssa15a | Ots05p |
| <b>18.2</b> | Cart37    | Calb23  | Cclu17            | Sf31  | Ssa06b | Ots18  |
| <b>19.1</b> | Cart13    | Calb04  | Cclu30            | Sf15  | Ssa10b | Ots19  |
| <b>19.2</b> | Cart11    | Calb15b | Cclu11            | Sf20  | Ssa16a | Ots06p |
| <b>20.1</b> | Cart08b^  | Calb36  | Cclu01a           | Sf07a | Ssa05b | Ots23  |
| <b>20.2</b> | Cart02b   | Calb20a | missing           | Sf29  | Ssa02a | Ots03p |
| <b>21.1</b> | Cart05b   | Calb13a | Cclu12            | Sf05b | Ssa29  | Ots29  |
| <b>21.2</b> | Cart36    | Calb26  | Cclu39            | Sf16  | Ssa19a | Ots16p |
| <b>22.1</b> | Cart02a   | Calb39^ | missing           | Sf39  | Ssa17a | Ots07p |
| <b>22.2</b> | missing   | Calb15a | Cclu19^           | Sf05a | Ssa16b | Ots14p |
| <b>23.1</b> | Cart07b^* | Calb03a | Cclu02a           | Sf02b | Ssa07b | Ots15p |
| <b>23.2</b> | Cart07b^* | missing | Cclu01b^          | Sf37  | Ssa17b | Ots17  |
| <b>24.1</b> | Cart04a   | Calb09b | Cclu24b           | Sf02a | Ssa07a | Ots15q |
| <b>24.2</b> | Cart35    | Calb32  | Cclu23            | Sf32  | Ssa18b | Ots10p |
| <b>25.1</b> | missing   | missing | Cclu09^           | Sf04b | Ssa04a | Ots34  |
| <b>25.2</b> | missing   | missing | missing           | Sf41  | Ssa08a | Ots11p |

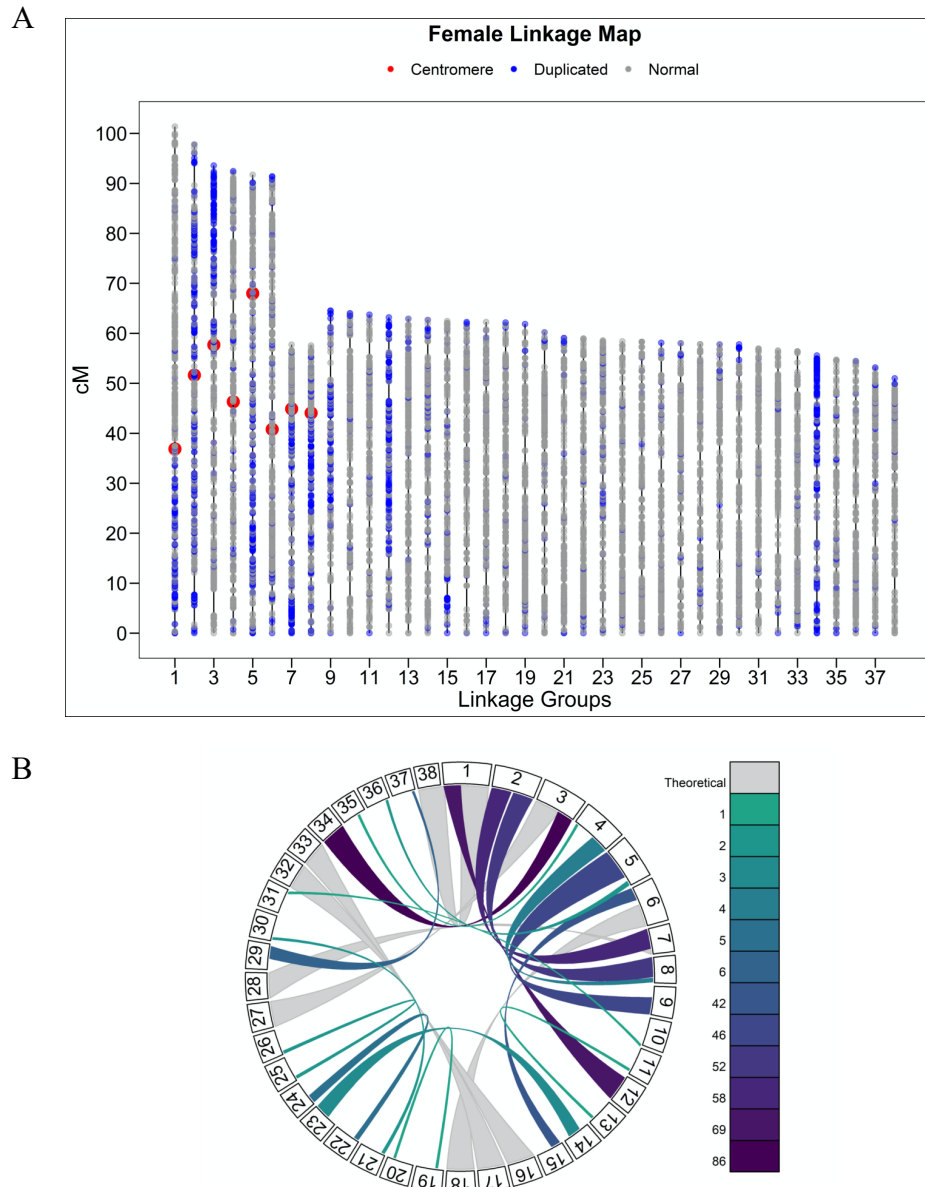

**Figure 1.** A) Female linkage map for cisco containing 20,450 loci. Each dot represents a locus, duplicated loci are blue and singleton loci are gray. Lengths are in centimorgans (cM). Approximate location of centromeres for metacentric LGs are denoted in red. Metacentric LGs were identified through homologous relationships of chromosome arms with other Salmonids via MAPCOMP. B) Circos plot of cisco LGs highlighting 17 supported homeologous regions within the linkage map. Included in the 17 homeologous regions are six of the eight regions that are likely still residually tetrasomic across the Salmonids. Colors represent the number of markers supporting relationship, with darker colors representing higher marker numbers (maximum support = 86 markers).

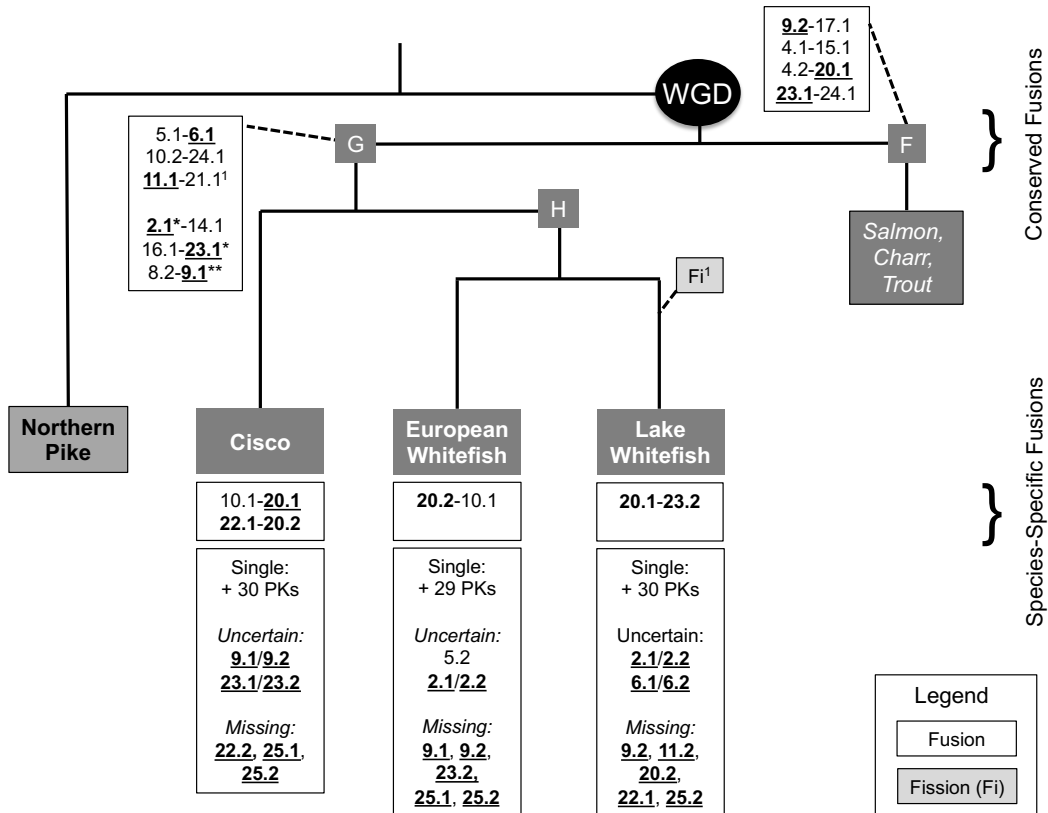

**Figure 2.** Fusions and fissions in the Coregoninae and Salmoninae lineages. This is an extension of Figure 4 from Sutherland et al. (2016). White boxes display the fusion events, where the homologous chromosomes for all species are named according to the protokaryotype ID. Bold and underlined chromosome numbers are the homeologous pairs that exhibit residual tetraploidy (i.e. “magic eight”), \* indicate uncertainty in one species, and \*\* indicates uncertain in two species (i.e., *C. artedi* is ambiguous for homeolog 9.1 or 9.2 while *C. lavaretus* is missing 9.1 and 9.2). Above the species names are conserved fusions, whereas below are the species-specific fusions. The phylogeny is adapted from (Crete-Lafreniere et al. 2012). Branch lengths do not represent phylogenetic distance, only relative phylogenetic position.

<sup>1</sup>Arms 11.1-21.1 were fused in both cisco and European whitefish, but likely underwent fission in lake whitefish.

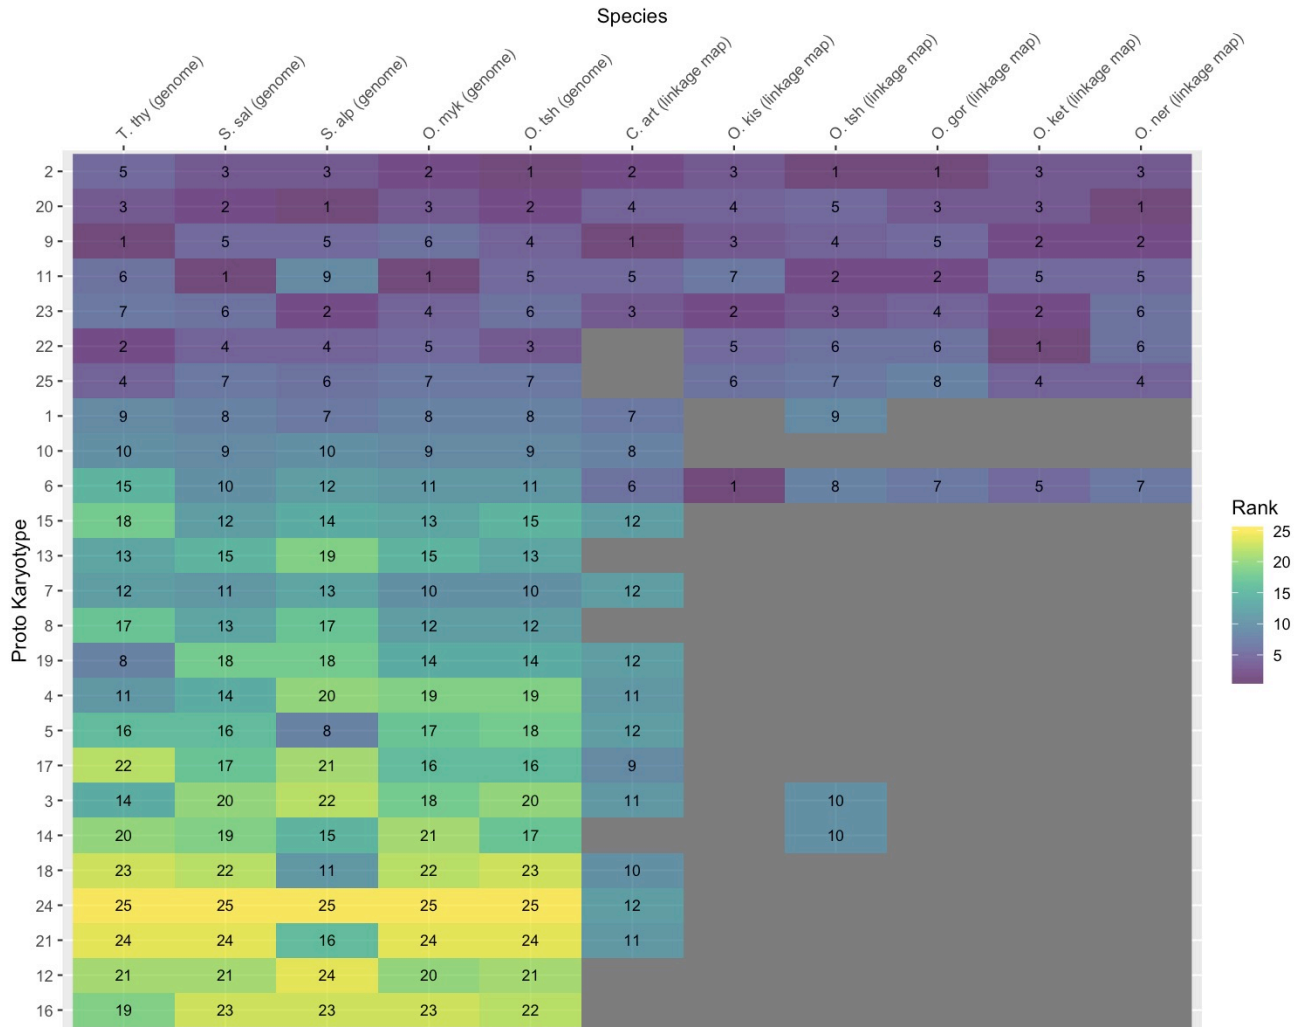

**Figure 3.** Ranking of homeologous chromosome pairs based on putative residual tetrasomic inheritance as measured by the number of markers shared among homeologs for linkage maps or percent sequence similarity for genomes. A lower rank represents more marker pairs supporting a homeolog and/or a higher sequence similarity. Chromosomes for all species are named according to the protokaryotype ID (PK). PKs are ordered in the figure by averaging the ranks across all species and then sorting the averages from smallest to largest (i.e., ordered from highest support for residual tetrasomy to lowest). Grey indicates that no duplicated loci could be mapped to both homeologs. Species abbreviations are grayling (*T. thy*), Atlantic salmon (*S. sal*), Arctic char (*S. alp*), rainbow trout (*O. myk*), Chinook salmon (*O. tsh*), cisco (*C. art*), and coho salmon (*O. kis*).



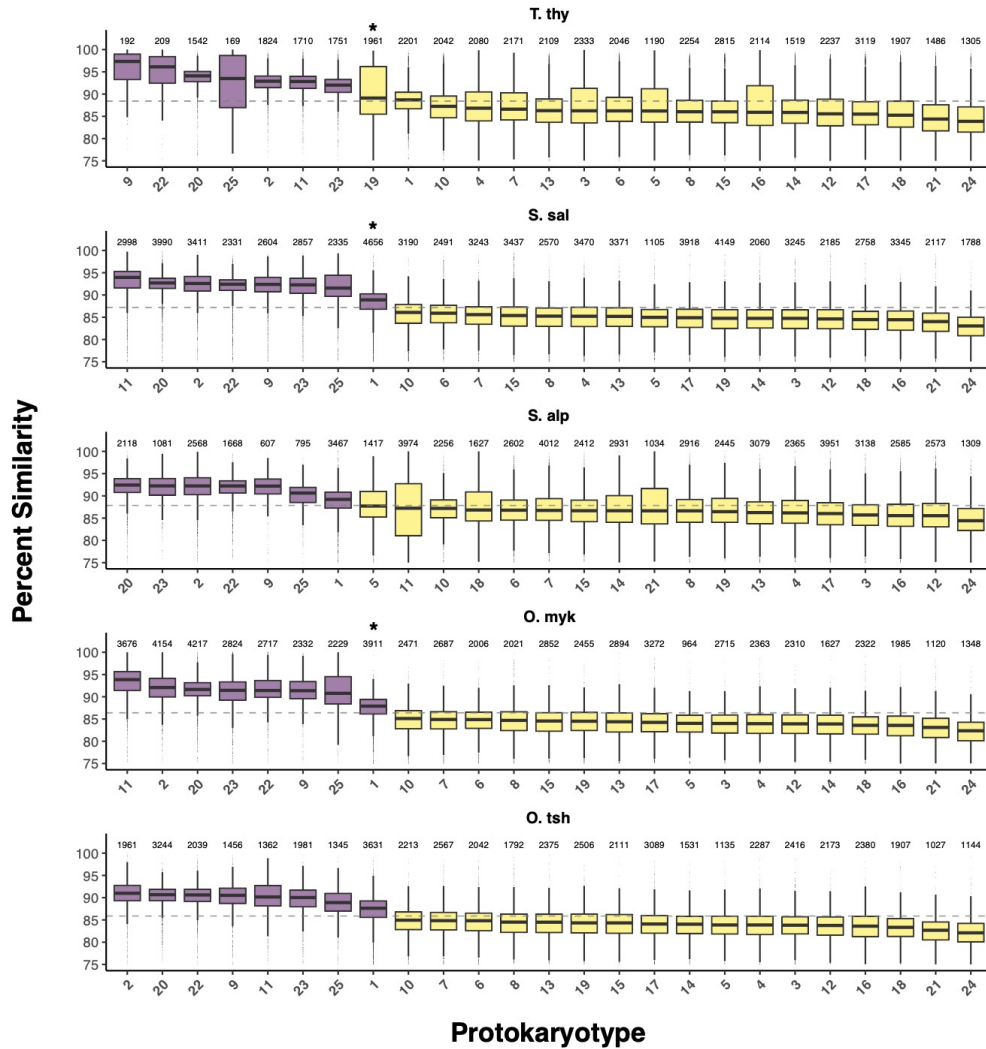

**Figure 4.** Distribution of protokaryotypes (PK) similarity across salmonids based on genome assemblies. For each species with a genome sequence, the percent similarity ( $y$  – axis) of the 25 PK pairs as shown as box plots. PK pairs are ranked from highest to lowest median similarity for each species ( $x$  – axis), with the average similarity of protokaryotypes presented as a dashed line. The classification of protokaryotypes by the machine learning approach described in the main text into putatively tetrasomic and disomic pairs is shown through coloring of the boxplots into purple (putatively tetrasomic) and yellow (putatively disomic). The number of alignments used in computing similarity is presented at the top of each bar. Those protokaryotypes that did not receive the highest observed voting proportion for the assigned class are indicated with an asterisk (\*). PKs with high variance (e.g. PK 11 in *S. alp*) may be due to methodological limitations that have caused additional non-homeologous chromosome arms to be included in the comparisons (see discussion). Species abbreviations are grayling (*T. thy*), Atlantic salmon (*S. sal*), Arctic char (*S. alp*), rainbow trout (*O. myk*), and Chinook salmon (*O. tsh*)

Supplementary tables and figures:

S1. Sampling information for cisco (*Coregonus artedi*) families collected from Lake Huron the number of individuals used. The number of offspring shown only includes those used for mapping after the removal of individuals with low sequencing coverage. The numbers of SNPs shown include those retained following quality control filtering but before inclusion in linkage mapping.

S2. Male linkage map for cisco (*Coregonus artedi*) containing 6340 loci. Each dot represents a locus. Lengths are in centimorgans (cM).

S3. Information for each marker on the female and male cisco (*Coregonus artedi*) linkage maps. Tag is the RAD tag, and marker name is the tag followed by a designation used to differentiate duplicated loci. The “Sequence P1 column” is the sequence from the single end read for each RAD tag, and the “Sequence PE” is the sequence obtained from paired-end assemblies.

S4. MAPCOMP determination of homologous chromosome arms. The cisco male and female maps were compared with markers paired through the Atlantic salmon genome to identify homology between chromosome arms. This shows the inconsistencies and poor resolution of the male map relative to the female map, which is expected given low male recombination

S5: Probable metacentric chromosomes from the MAPCOMP analysis for coregonines.

S6. Homeologous chromosome pairs for currently available haploid linkage maps and the number of marker pairs supporting homeology (Kodama et al. 2014; Larson et al. 2015; Waples et al. 2016; Tarpey et al. 2017). Homologous chromosomes are named according to the corresponding Northern Pike linkage group Protokaryotype ID (PK).

S7. Homeologous chromosome pairs for all available salmonid genomic resources.

S8. Support for classifications from k – nearest neighbor machine learning algorithm. Cross validation indicated five nearest neighbors should be used for classification across species. The vote proportion for assignment to either putatively tetrasomic or putatively disomic categories are presented as the proportion of votes out of five at the top of each bar. Median percent similarity for each protokaryotype pair is presented as the y – axis and protokaryotype pairs are ranked from most similar to least (x – axis).
